1 **Metabolomics and microbiome reveal impacts of rhizosphere metabolites on alfalfa**  
2 **continuous cropping**

3

4 Ruiting Wang<sup>1</sup>, Jinxin Liu<sup>1</sup>, Wanyi Jiang<sup>1</sup>, Pingsheng Ji<sup>2</sup>, Yonggang Li<sup>1,\*</sup>

5 <sup>1</sup>Agricultural College, Northeast Agricultural University, Harbin 150030, China

6 <sup>2</sup>Department of Plant Pathology, University of Georgia, Tifton, GA 31794, USA

7 \*Corresponding author.

8 **Email:** neaulyg@126.com (Y. G. Li).

9

10

11 **The final character count: 23831**

## 12 **Abstract**

13 Alfalfa long-term continuous cropping (CC) can pose a serious threat to alfalfa production. However, the  
14 mechanism of alfalfa CC obstacle is unclear as of today. In this study, we determined physico-chemical property,  
15 microbial population structure, and metabolite differences of alfalfa rhizosphere soils with CC for 1, 7, and  
16 14-years based on analysis of metabolomics and microbiomics. Shifts of functional microorganisms in  
17 rhizosphere soil were analyzed, key metabolites and their effects on alfalfa seeds, seedlings and root rot  
18 pathogens were assessed. Based on analysis, p-coumaric acid and ferulic acid on alfalfa seed and seedling  
19 growth and root rot pathogens were basically consistent with the influence of CC obstacles in the field. With  
20 the increase of CC years, the microbial community in soils changed from fungal to bacterial, and beneficial  
21 microorganisms decreased with the increase of CC years, which echoed the performance of alfalfa CC  
22 obstacles. The autotoxicity of p-coumaric acid was the strongest. This study fully proved that the continuous  
23 accumulation of autotoxic substances in alfalfa rhizosphere was the key factor causing alfalfa CC obstacles.

24

25 **Keywords:** Alfalfa continuous cropping obstacle/ Root rot/ Metabolomics/ Microbiomics/ Autotoxic  
26 substances

27

28

## 29 **Introduction**

30 Alfalfa (*Medicago sativa* L.), also called lucerne or purple medic, is a perennial, clover-like, leguminous plant  
31 of the pea family (Fabaceae). It is widely grown primarily for hay, pasturage and silage in the United States,  
32 Europe and Asia (Graham & Vance, 2003) and is the main animal feed. The Ministry of Agriculture of the  
33 People's Republic of China reported that cultivated area of alfalfa in China was 4.7 million ha with a  
34 production of 32.17 million tons from the end of 2015 to 2017. Among them, the commercial alfalfa planting  
35 area was 0.43 million ha, and the high-quality alfalfa planting area was 0.21 million ha with a production of  
36 1.8 million tons. It was anticipated that the planting area of high-quality alfalfa in China will increase by 0.2  
37 million ha by 2020 with a production of 3.6 million tons. However, with the continuous expansion of alfalfa  
38 planting area, alfalfa production capacity decreased year by year in fields continuously planted for more than 4

39 years. Reduced production capacity was reflected in that root activity declined gradually, seed germination rate  
40 decreased seriously, root rot incidence increased year by year, and it was difficult to survive resowing or  
41 replanting (Rong et al, 2016) This phenomenon is a typical continuous cropping (CC) obstacle of alfalfa.

42 There are two main explanations on the formation of CC obstacles of alfalfa in the literature. The first  
43 viewpoint is that alfalfa is a crop with deep root system and high water and fertilizer consumption. After  
44 continuous growth for many years, it will lead to soil water and fertilizer deficit, which causes a large area  
45 decline of alfalfa growth (Wu et al, 2015; Molero et al, 2019). Li et al. (2010) and Xia et al. (2015) also  
46 believed that CC of alfalfa led to deterioration of soil physical and chemical properties that are difficult to  
47 restore. However, other scholars hold different points of view. Li et al. (2010) found that planting alfalfa in the  
48 same land for more than 10 years could lead to serious land degradation and significant decline of alfalfa yield  
49 in the Loess Plateau. Viliana & Ognyan (2015) stated that certain numbers of roots would disappear after each  
50 harvest in the CC process of alfalfa, which could provide organic materials for the soil and increase soil  
51 organic matter contents. Jiang et al. (2007) reported that soil quality deteriorated but alfalfa yield increased in  
52 the first nine years, while soil quality tended to recover but alfalfa yield decreased in the following years. Our  
53 field studies also indicated that CC obstacle still occurred even if fertilizers and water were sufficient (Li, Y.  
54 G., unpublished). These studies demonstrated that soil moisture and fertility were not the primary factors  
55 causing the problems in alfalfa production, such as slow seed germination, delayed returning green, poor  
56 growth, yield and quality decline, and severe root rot in CC for more than 4 years.

57 Another explanation is that the continuous accumulation of autotoxic allelochemicals causes CC obstacle of  
58 alfalfa. Allelopathy is defined as the direct/indirect harmful/beneficial effect via the production of chemical  
59 compounds that escape into the environment (Rice, 1984). Allelopathy is a biological phenomenon by which  
60 an organism produces one or more biochemical substances that influence the germination, growth, survival,  
61 and reproduction of other organisms in the same community (Zuo et al, 2015). It was reported that alfalfa  
62 produced a number of useful phytochemicals, including soyasapogenol glycoside B (Wyman-Simpson et al,  
63 1991 ), medicarpin and isoflavonoid (Miller, 1988), chlorogenic acid, ferulic acid, p-hydroxybenzoic acid,  
64 caffeic acid, coumarin, ferulic acid (Rong et al, 2016; Abdul-Rahman & Habib, 1989), amic acid,  
65 hydroxybenzoic acid, coumarin and tricinin (Zheng et al, 2018). These phenolic acids had inhibitory effects on

66 plant seedlings, plant photosynthesis and respiration (John & Sarada, 2012; Li et al, 2012; Zhang et al, 2016;  
67 Biumal et al, 2019). Chung et al. (2000) reported that chlorogenic acid was involved in alfalfa autotoxicity.  
68 Rong et al. (2016) found that contents of coumarin, ferulic acid, chlorogenic acid and caffeic acid varied in 18  
69 alfalfa varieties, with coumarin and chlorogenic acid being significantly higher than ferulic acid and caffeic  
70 acid. In other studies, phenolic acid such as p-coumaric acid inhibited photosynthesis and enzymatic activities  
71 of PG1, CG6PDH, AID and OPPP, which was detrimental to plant and root growth and altered morphological  
72 and physical structures of alfalfa roots (Zheng et al, 2018; Rong, 2017). These studies suggested that  
73 continuous accumulation of autotoxic substances in alfalfa rhizosphere might be the primary factor causing  
74 alfalfa CC obstacle; however, direct evidence supporting the theory is lacking.

75 Methods available for studying CC obstacle, include multi-omics, such as high throughput isolation  
76 (culturomics), analyzing structural and functional changes of plant rhizosphere microorganisms  
77 (microbiomics), targeting the taxonomic composition (metabarcoding), addressing the metabolic potential  
78 (metabarcoding of functional genes, metagenomics), and analyzing components of plant rhizosphere exudates  
79 (metabolomics). Through metabolomics, we can quickly understand the metabolic changes of organisms under  
80 the stimulation of different biological factors and environmental factors, search for biomarkers with the  
81 purpose of identifying metabolites related to various diseases and environmental exposure (Nicholson &  
82 Lindon, 2008, Liu et al, 2018). Through microbiomics, we can have a comprehensive understanding that plant  
83 surfaces and interior parts are populated by myriads of bacteria, fungi and microbes from other kingdoms  
84 which can have considerable effects on plant growth, disease resistance, abiotic stress tolerance and nutrient  
85 uptake (Xie et al, 2019). In CC systems, the same crop root secretions may not only affect plant growth, but  
86 also lead to simpler microbial community structure, which may negatively affect agroecosystems especially in  
87 terms of the aggravation of pathogens and soil-borne fungi. Plant-microbial interactions can have positive or  
88 negative effects on plant growth through a variety of mechanisms. Root exudates are one of the most important  
89 chemical signals in determining whether the interactions are benign or harmful (Bais et al, 2006). Identification  
90 of major differences in root exudates may be helpful in understanding changes of rhizosphere microbial  
91 community structure (Brown et al, 2020). The combination of metabolomics and microbiomics can be a  
92 powerful tool to analyze the mechanism of CC obstacles. Lin et al. (Lin et al, 2015) reported that the

93 accumulation of allelochemicals in rhizosphere soil increased harmful microorganisms and decreased  
94 beneficial microorganisms, resulting in imbalance of microbial community structure and degradation of soil  
95 ecological function. Zhao et al. (2018) indicated that continuous coffee cultivation reduced potentially  
96 beneficial microbes in soil. Li et al. (2014b) showed that peanut root exudates promoted the growth of root rot  
97 pathogens *Fusarium oxysporum* and *Phoma* sp. and inhibited the growth of beneficial bacteria, such as  
98 *Mortierella elonate* and *Trichoderma* sp. However, the advanced metabolomics and microbiomics technologies  
99 have not been used in research of CC obstacles of alfalfa to elucidate mechanisms involved in the complex  
100 disease system.

101 The objectives of this research were: 1) to determine the role of continuously accumulation of autotoxic  
102 substances in CC obstacle of alfalfa; 2) to identify key metabolites causing CC obstacle and determine their  
103 effects on alfalfa seed germination and seedling growth; and 3) to evaluate the effects of key metabolites on  
104 root rot pathogens and diseases and rhizosphere microecology.

105

## 106 **Results**

### 107 **Soil nutrients and enzyme activities**

108 Most of the nutrient contents tested in the 7 and 14-year rhizosphere soils were lower than the 1-year  
109 rhizosphere soil, including N, P, K, B, Fe, Mn, and Mg, but Cu and Zn did not decrease with the increase of  
110 CC years (Table 1). There were significant differences in soil enzyme activities in the rhizosphere soils of  
111 different cropping years ( $P < 0.05$ , Fig. 1). Polyphenol oxidase, neutral phosphatase and sucrase activities  
112 decreased with the increase of CC years, while urease increased in 7-year and decreased in 14-year rhizosphere  
113 soils.

114

### 115 **Soil extracts from alfalfa rhizosphere soil on alfalfa growth**

116 When alfalfa seeds were treated with alfalfa rhizosphere soil extracts, the germination rate in treatment with  
117 rhizosphere soil extract of alfalfa planted for 1 year was equivalent to the nontreated control, which was  
118 significantly higher than those planted for 7 and 14 years ( $P < 0.05$ , Fig. 2 A and C). Height of alfalfa seedlings  
119 in the 1-year treatment, but not the 7 and 14-year treatments, was significantly greater than the control (Fig. 2

120 *B* and *D*). However, root length of the 1, 7 and 14-year treatments was not significantly different from the  
121 control.

122

### 123 **Metabolomics analysis of alfalfa rhizosphere soils**

124 The peak with detection rate below 50% of RSD >30% was removed from the QC samples (Dunn et al, 2011).  
125 Principle Component Analysis (PCA) and least squares-discriminant analysis (PLS-DA) were performed. A  
126 total of 161 different metabolic compounds were identified from rhizosphere soils of the 1, 7, and 14-year  
127 treatments (Fig. 3), which were classified according to their chemical property as sugar compounds (26), sugar  
128 acids (3), sugar alcohols (6), short-chain organic acids (16), long-chain organic acids (31), nucleotides (12),  
129 amino acids (14), esters (6), alcohols (16), and others (31). There were significant differences in the peak  
130 values of 58 metabolites from the rhizosphere soils. Combining VIP > 1 and independent sample T test ( $P <$   
131 0.05), there were 52 differential metabolites down-regulated and 6 differential metabolites up-regulated (Table  
132 S1). Among them, vanillic acid, p-hydroxybenzoic acid, ferulic acid, and p-coumaric acid increased  
133 significantly with the increase of CC years, and accumulation of p-hydroxybenzoic acid and p-coumaric acid  
134 was more significant with the increase of alfalfa CC years (Table 2).

135 The effects of four phenolic acids on alfalfa plant were evaluated at concentrations of 10, 25, 50 and 100  
136  $\mu\text{g/mL}$ . Inhibitory effect on seed germination and plant growth was as follows: p-coumaric acid > ferulic  
137 acid > vanillic acid and p-hydroxybenzoic acid, with higher concentrations having greater inhibition than a  
138 lower concentration (Fig. 4). P-coumaric acid reduced root length significantly at all concentrations, compared  
139 to the control, and the other three compounds reduced root length significantly at higher concentrations (Fig. 4  
140 *E-H*). Higher concentrations of ferulic acid and p-hydroxybenzoic acid reduced plant height significantly  
141 compared to the control, but vanillic acid did not reduce plant height at all concentrations (Fig. 4*E*).

142

### 143 **Key metabolites from alfalfa rhizosphere soils on alfalfa root rot pathogens**

144 Three fungal pathogens *Fusarium trinctum*, *F. acuminatum* and *F. oxysporum* that cause alfalfa root rot were  
145 used to assess the relationship between metabolites of alfalfa rhizosphere and root rot of alfalfa. Extracts of  
146 rhizosphere soil in 14-year alfalfa CC significantly enhanced mycelial growth of *F. trinctum*, *F. acuminatum*

147 and *F. oxysporum* when used at 1%, 5% and 10% compared to 1-year and the water control (Fig. 5). Extracts  
148 of rhizosphere soil in 7-year alfalfa CC also enhanced mycelial growth of the pathogens significantly when  
149 used at higher concentrations. The effects of four phenolic acids on mycelial growth of the fungal pathogens  
150 were evaluated. They enhanced mycelial growth with effects in the following order: p-coumaric acid > ferulic  
151 acid > vanillic acid > p-hydroxybenzoic acid (Fig. 6). Higher concentrations of the phenolic acids had greater  
152 effects in enhancing mycelial growth of the fungal pathogens. When tested at 10, 25, 50 and 100 µg/mL, the  
153 four phenolic acids at higher concentrations also significantly enhanced conidial germination and production of  
154 *F. acuminatum* and *F. oxysporum* (Fig. 7). Among the phenolic acids, p-coumaric acid had the greatest  
155 promoting effect on conidial germination and production. When inoculated with *F. trinctum*, *F. acuminatum*  
156 and *F. oxysporum* in greenhouse studies, severity of alfalfa root rot treated by p-coumaric acid increased  
157 significantly with 50 µg/mL having greater effect than 10 µg/mL (Fig. 8). Growth and development of  
158 seedlings were also suppressed by p-coumaric acid.

159

#### 160 **Alfalfa CC on alfalfa rhizosphere microecology**

161 Microbial community sequences of the rhizosphere soil samples were analyzed on Illumina Miseq PE300  
162 platform and divided by OTUs. Principle Component Analysis (PCoA) based on detected OTUs showed that  
163 there were significant differences in community composition of the rhizosphere soils, and Anova analysis  
164 showed that there were significant differences among groups ( $P < 0.05$ , Fig. 9 *D1* and *E1*). The diversity of  
165 bacterial community was high and the number of OTUs decreased with the CC increase (Fig. 9 *D2*). The  
166 diversity of bacterial community of 14-year CC was the lowest, while the diversity of fungal community of  
167 1-year cropping was the lowest (Fig. 9 *E2*). Small changes in root exudates can lead to changes in soil  
168 microbial structure (Ling et al, 2011). This change could lead to soil microecological damage as well as disease  
169 and pest problems (Liu et al, 2020). These results seem to indicate that CC can change the microbial  
170 composition of soil from bacterial-dominated to fungal-dominated (Lin et al, 2015).

171 Most OTUs of bacteria were *Actinobacteria* (35.55%, 37.54%, and 40.28% for 1-year, 7-year and 14 year  
172 CC respectively), *Acidobacteria* (24.07%, 18.49%, and 19.53% for 1-year, 7-year and 14-year) and  
173 *Proteobacteria*, and a small proportion belonged to *Gemmatimonadetes*, *Verrucinobacter*, *Nitrospiraceae*, and

174 *Bacteroidetes* (Fig. 10D). *Bacillus* is considered an important soil conditioner and can be used as a biological  
175 control agent (Li et al., 2018). In our present study, the abundance of *Bacillus* decreased in years and then  
176 increased in 14 years. Most OTUs of fungi belonged to *Ascomycota* (56.14%, 65.57%, and 73.72% for 1, 7,  
177 and 14-year CC, respectively), *Basidiomycota*, *Mortierellomycota*, *Glomeromycota*, and *Chytridiomycota* (Fig.  
178 10E).

179

### 180 **P-coumaric acid on rhizosphere microbial communities**

181 In order to verify the correlation between microbial population changes and metabolites secreted in the  
182 rhizosphere, alfalfa rhizosphere soil was treated with p-coumaric acid, the most influential metabolite secreted  
183 by alfalfa. The results showed that significant changes occurred in the bacterial and fungal communities  
184 (Fig.11 *DI* and *EI*). The number of OTU in bacterial and fungal communities decreased when treated with 10  
185  $\mu\text{g/mL}$  p-coumaric acid but increased when treated with 50  $\mu\text{g/mL}$  p-coumaric acid. The number of OTU in  
186 soil bacterial community treated with p-coumaric acid was less than that of the control (Fig.11 *D2* and *E2*).  
187 The biodiversity of bacterial community was the highest when treated with 10  $\mu\text{g/mL}$  of p-coumaric acid, the  
188 lowest with 50  $\mu\text{g/mL}$ , and the diversity of soil fungal community increased gradually with the increase of  
189 p-coumaric acid concentration, which was consistent with the previous results of continuous cropping.  
190 However, the number of microorganisms in alfalfa rhizosphere soil in the pots treated with p-coumaric acid  
191 was lower than that in the field.

192 Analysis of microbial species and functions indicated that the *Gemmatimonadetes* decreased with increasing  
193 concentration of p-coumaric acid (Fig.12D). The relative abundance of bacterial species decreased to different  
194 degrees, with 8 main bacterial species in the top 20 species showing a decreasing trend, 6 bacterial groups  
195 showing the trend of decreasing when treated with 10  $\mu\text{g/mL}$  p-coumaric acid and increasing with 50  $\mu\text{g/mL}$ ,  
196 and 5 groups of bacteria showing the trend of increasing with 10  $\mu\text{g/mL}$  and decreasing with 50  $\mu\text{g/mL}$  (Fig.  
197 12F). *Sphingomonas* increased with the addition of p-coumaric acid, which was consistent with the  
198 experimental results described above. *Sphingomonas* and *Gemmatimonas* were related to nitrogen metabolism  
199 and transformation, as well as the change of  $\text{NH}_4^+\text{-N}$  and  $\text{N}_2\text{O}$  contents (Nathanae et al, 2009; Shen et al,2014,  
200 Li et al, 2017). *Candidatus Solibacter* is able to decompose organic matter, and the results showed it decreased



201 with the increase of p-coumaric acid concentration (Zak et al, 1996). *Bryobacter* promoted soil carbon cycle  
202 (Li et al, 2012), which showed a trend of increasing at first and then decreasing, and was lower in the  
203 p-coumaric acid treatment (50 µg/mL) than the control soil (Fig.12E).

#### 204 **Discussion**

205 The soil enzyme is a key criterion for evaluating different residue covering approaches, as it is an important  
206 indicator of soil quality and function. Sucrase can reflect the conversion ability of organic carbon (Cantarella et  
207 al, 2018). As the CC years increase, the conversion of organic carbon gradually decreases, which is consistent  
208 with studies of Liu et al. (2017). Soil urease reflects the transformation ability of soil organic nitrogen to  
209 available nitrogen and the supply ability of soil inorganic nitrogen (Tawaraya et al, 2014). Phosphatase can  
210 catalyze the hydrolysis of soil monophosphate to form inorganic phosphorus, which can be absorbed by plants,  
211 and soil phosphatase activity can be used to characterize the state of soil phosphate (Hu et al, 2015). Our  
212 present study indicated that the activity of soil phosphatase transformation decreased with the increase of CC  
213 years. In the meantime, the content of phosphorus in soil decreased with the increase of CC years. Soil catalase  
214 activity indicates its ability to remove the toxicity of hydrogen peroxide, which could reflect soil quality and  
215 the total metabolic activity of soil microorganisms (Zhang et al, 2012). Overall, soil quality became worse with  
216 the increase of CC years of alfalfa.

217 Development of alfalfa seedlings needs the support of external nutrition. In the study plant height and root  
218 length from seeds treated with rhizosphere soil extracts decreased with the increase of CC years, which might  
219 be because soil nutrient condition gradually became worse. However, theoretically nutrition for seed  
220 germination is provided by the nutrition stored by the seed itself and there is little need for extra nutrition. The  
221 richness of soil nutrients only affects the growth of seedlings after germination but does not affect seed  
222 germination rate (Meng et al, 2006). Our present study provides two evidences that do not support the  
223 view that the main factors of alfalfa CC obstacle were the lack of soil nutrients. One was that seed germination  
224 does not need external nutrients, and at least the germination rate of alfalfa seeds treated by soil extracts from  
225 the 1, 7, and 14-year CC should be similar to that of the water treatment control. However, it is interesting that  
226 seed germination rate decreased significantly with the increase of CC years. Another evidence was that  
227 nutrients in the soil extracts from the three alfalfa cropping years were richer than the water control. In theory

228 the soil extracts of the three cropping years should have significant effects on the growth of alfalfa seedlings  
229 compared to the control. However, our results showed that the effects of soil extracts from CC for 7 and 14  
230 years on seedling growth were similar to that of the control. These results indicated that lack of nutrients in  
231 alfalfa rhizosphere soil was not the key factor resulting in alfalfa CC obstacles.

232 As our results, the accumulation of phenolic acids in the soil after CC significantly affects the rhizosphere  
233 ecosystem, for instance, by inducing changes in microbial populations, soil enzyme activity and nutrient  
234 cycling (Halvorson et al, 2009; Chen et al, 2020). Many perennial and annual crop species are threatened by  
235 CC problems associated with reduced plant growth and vigor as well as reduced crop yields and quality (Chen  
236 et al, 2012; Li et al, 2018; Li & Liu, 2018). In fact, previous studies have shown that phenolic acids are a major  
237 secondary metabolite of CC disorder (Muscolo & Sidari, 2006). In studies on cucumber, strawberry, tobacco  
238 and Rehmannia, soils continuously planted were found to contain self-toxic substances, phenolic acid, which  
239 repressed growth of the same plant (Li et al, 2012; Wu et al, 2009; Chen et al, 2011; Li et al, 2015b). With the  
240 extension of CC years, the concentration of phenolic acid in the soil increased gradually (Huang et al, 2013).  
241 Qu and Wang (Qu & Wang, 2008) reported that two phenolic acids from soybean root exudates,  
242 2,4-di-tert-butylphenol and vanillic acid, had significant negative effect on microbial communities and soybean  
243 monoculture. Li et al. (2012) also found that the extracts from rhizosphere soil of Ginseng CC had significant  
244 inhibition allelopathy on the growth of radicle. These are consistent with our findings about the inhibitory  
245 effects of the phenolic acids on alfalfa. With the increase of alfalfa CC years, the contents of four phenolic  
246 acids (vanillic acid, p-hydroxybenzoic acid, ferulic acid and p-coumaric acid) increased significantly (Table 2).  
247 Therefore, we thought that the occurrence of alfalfa CC obstacle may be related to the phenolic acids.

248 Crop roots respond to pathogen infections by changing the amount and composition of root exudates  
249 (Lanoue et al, 2010). Studies showed that cucumber CC usually led to the accumulation of soil-borne  
250 pathogens such as *Fusarium* spp. (Zhou & Wu, 2012). In alfalfa CC, we also found that root rot caused by  
251 diverse pathogens increased with the increase of alfalfa CC years. Wu et al. (2015) reported that a mixture of  
252 phenolic acids promoted the growth of *F. oxysporum* hyphae, spore formation and production. Zhou et al.  
253 (2012) indicated that the amount of p-coumaric acid from cucumber could increase the number and population  
254 density of *F. oxysporum* in soil and disease incidence in the field. A number of studies also demonstrated that

255 CC significantly increased levels of fungal pathogens causing root diseases of *Rehmannia glutinosa*, soybean  
256 and cucumber (Wu et al, 2015; Guo et al, 2011; Zhou & Wu, 2012a). These studies are in agreement with our  
257 research that alfalfa root rot was getting more severe with the increase of CC years. Our present study further  
258 confirmed that metabolites secreted by alfalfa rhizosphere, such as p-coumaric acid, had strong effects on  
259 alfalfa root rot and may be the key factor of alfalfa CC obstacle.

260 Soil bacteria are responsible for decomposing organic matter into inorganic matter and thus maintaining soil  
261 fertility, so we did a differential analysis of soil bacterial flora for different years of CC (Fig. 10F). The results  
262 show that *Gaiella*, *Pseudonocarida*, *Mycobacterium* and *Bradyrhizobium* in the soil samples increased  
263 gradually with the increase of CC years, and *Solirubrobacter* decreased with the increase of CC years. The  
264 relative abundance of *Sphingomonas* was less than 1% in 1-year and more than 1.4% in 14-year treatments,  
265 showing an increase with CC. Other studies have shown that *Sphingomonas* was a nutrient-poor  
266 nanobacterium, which could adapt to heterotrophic growth under conditions of nutrient depletion (Williams et  
267 al, 2009; Kämpfer et al, 2002; Pooja et al, 2010). In this paper, the increase of *Sphingomonas* indicates that  
268 after 14 years of continuous cultivation, the rhizosphere soil presented a state of nutrient depletion. This is  
269 consistent with the results of Chen et al. (2020). The relative abundance of bacteria RB41 was higher than  
270 7.2% in 14 years of CC, which was higher than in 1 and 7-years. The acid bacteria may play an important role  
271 in remaining the metabolism of soil under long-term low nutrient stress, and could degrade the polymer of  
272 plant residues (Aislabie et al, 2006; Fan et al, 2018). *Bradyrhizobium* is a diazotrophic bacterium in soil, which  
273 plays an important role in nodule formation, ammonia production and nitrogen fixation symbiosis in legume  
274 roots (Masuda et al, 2016; Shiro et al, 2016; Saeki et al, 2017; Siqueira et al, 2017). The difference of relative  
275 abundance of *Bradyrhizobium* in three different CC years was significant, which was higher in 14-year CC  
276 than in 1-year. Two fungi *Gibberella* and *Metarhizium* were 11.5% in soil after one year of CC and 1-2% after  
277 14 years of CC. In the CC process, the bacterial community in soil decreased significantly.

278 It appeared that the change of alfalfa rhizosphere microbial communities treated with p-coumaric acid was  
279 basically consistent with that of alfalfa CC obstacle. There were some differences between results in the potted  
280 alfalfa study and the actual field conditions, which was probably due to other secondary autotoxic substances.  
281 Overall, alfalfa CC had an impact on soil microbial communities, and the accumulation of autotoxins in

282 rhizosphere soils increased harmful microorganisms and decreased beneficial microorganisms (such as  
283 *Gemmatimonadetes* and *Sphingomonas et al*), resulting in imbalance of microbial community and degradation  
284 of soil ecological function.

285 And the results of the four phenolic acid treated seeds and pathogens were similar to those treated by soil  
286 extracts. The occurrence of CC obstacle was directly related to the four phenolic acids secreted by alfalfa  
287 rhizosphere. Among them, the effects of ferulic acid and p-coumaric acid on alfalfa seed germination and  
288 mycelium growth were significant. The effects of p-coumaric acid on alfalfa seedling development were  
289 obvious, and the effects of ferulic acid on spore production and germination of pathogenic fungi causing alfalfa  
290 root rot were significant. Bi et al. (2010) reported that nine phenolic acids, such as p-hydroxybenzoic acid,  
291 coumaric acid, and ferulic acid, were detected in commercially grown Ginseng rhizosphere soils, which could  
292 inhibit the growth of radicles and buds. Zhou & Wu (2012a) found p-coumaric acid, an autotoxin of cucumber,  
293 increased *F. oxysporum* f. sp. *cucumerinum* population densities in soil and the severity of Fusarium wilt under  
294 field conditions. Wu et al. (2015) indicated that phenolic acid mixtures promoted hyphal growth, spore  
295 formation and production of *F. oxysporum* that causes wilt disease of *Rehmannia glutinosa*. Tao et al. (2018)  
296 reported that both p-hydroxybenzoic acid and ferulic acid could inhibit alfalfa seed germination and seedling  
297 development. Therefore, we think that the four phenolic acids secreted in the rhizosphere of alfalfa were the  
298 main factors causing severe alfalfa root rot in the alfalfa CC obstacle.

299 In this study, we found that the main factors causing CC obstacle were not the lack of nutrients or water in  
300 alfalfa rhizosphere soil. Based on metabolomics and microbiology analysis, the effects of certain key  
301 metabolites, including p-coumaric acid, ferulic acid and other phenolic acids, on alfalfa seed and seedling  
302 growth and root rot pathogens were basically consistent with the influence of CC obstacles in the field. In  
303 addition, with the increase of CC years, the microbial community in soil changed from fungal to bacterial, and  
304 beneficial microorganisms decreased with the increase of CC years. The effects of the key metabolites from  
305 alfalfa rhizosphere on alfalfa seed germination, seedling growth and root rot were further verified, which  
306 resulted in similar alfalfa performance as in CC obstacles. Among these key metabolites, the autotoxicity of  
307 p-coumaric acid was the strongest. This study fully proved that the continuous accumulation of autotoxic  
308 substances in the rhizosphere was the key factor of alfalfa CC obstacle.

309

## 310 **Materials and Methods**

### 311 **Soil Sampling**

312 The study was conducted on an experimental farm located in Dörbets, Daqing, Heilongjiang, Northeast China  
313 (124.25' E, 46.30' E) with a continental monsoon climate. The soil type was sandy loam and average depth of  
314 topsoil was about 30 cm. No location had history of hardpan. Soil samples were collected in October 2019  
315 using the five-spot-sampling method from the rhizosphere of alfalfa plants grown in the fields with a history of  
316 alfalfa CC for 1, 7 and 14 years. The soil samples, thoroughly homogenized through a 20-mesh sieve to  
317 remove root debris, were placed in sterile bags and then transferred to liquid nitrogen and stored in ice boxes.  
318 The samples were transported to the laboratory and stored at -80°C for  
319 metabonomic and microbiological analysis. In the meantime, a portion of the soil samples was dried for  
320 analysis of soil properties. Each treatment had three replicate samples.

321

### 322 **Assessment of soil properties**

323 Physic-chemical properties of the rhizosphere soils, including available P (AP), available N (N), Fe, Mn, Cu,  
324 Zn and EC values, were analyzed at the Soil and Fertilizer Testing Center of Heilongjiang Academy of  
325 Agricultural Sciences (Harbin, China). Enzyme activities were assessed using a soil enzyme activity test Kit  
326 (Suzhou Grace Biotechnology Co., Ltd., Suzhou, China). Specific measurement and analysis followed the  
327 manufacturer's instructions using Multiskan sky (Thermo Fisher Scientific, Waltham, MA, USA). Assessment  
328 of the enzyme activities was as the following: soil urease (S-UE) was measured at 578 nm; neutral phosphatase  
329 (S-NP, G0306W) catalyzes p-nitrophenyl phosphate (pNPP) to produce a yellow product PNP, which has a  
330 maximum absorption peak at 405 nm, and the enzyme activity was measured by the rate of increase of PNP;  
331 solid polyphenol oxidase (S-PPO, G0311W) catalyzes gallic acid to produce gallium, which has a  
332 characteristic light absorption at 430 nm, reflecting polyphenol oxidase activity; solid sucrase (S-SC, G0302W)  
333 catalyzes the degradation of sucrose into reducing sugar and reacts with 3, 5-dinitrosalicylic acid to form  
334 colored metal amides with characteristic light absorption at 540 nm; soil catalase (S-CAT, G0303W) catalyzes  
335 hydrogen peroxide to produce water and oxygen and the remaining hydrogen peroxide reacts with a

336 chromogenic probe to produce a colored substance with a maximum absorption at about 510 nm. Each  
337 treatment had three replicates and the experiment was conducted twice.

338

### 339 **Effects of soil extracts on alfalfa seedling and pathogen growth**

340 To assess the effects of the autotoxic substances on alfalfa seed and fungal pathogens causing alfalfa root rot,  
341 soil extracts from the rhizosphere soil samples were prepared. Ten grams of soil were mixed with 250 mL  
342 distilled water and shaken for 24 h (Yang et al, 2009). The supernatant was filtered, distilled and concentrated  
343 to 1 mL/g of soil using a rotary evaporator (Strike 300, Guangzhou Wengdi Instruction Co., Ltd, China). The  
344 concentrated supernatants were filtered through a bacterial filter and stored at 4°C.

345 Alfalfa seeds were immersed in 1.5% sodium hypochlorite for 10 min, rinsed 5 times with distilled water, air  
346 dried, and soaked in the soil extracts (1 mL/g) for 30 min. Treated seeds were placed on sterile filter paper in a  
347 petri dish (50 seeds/dish). Two mL of soil extract was added to each dish and the dishes were incubated in a  
348 growth chamber at 25°C with 12-h photoperiod. Alfalfa seeds treated with equal amount of distilled water were  
349 used as the control. Each treatment had three replicates and the experiment was conducted twice. Seed  
350 germination rate, root length and plant height of alfalfa were measured 7 days after incubation.

351 To assess the effects of soil extracts on pathogens causing alfalfa root rot, three fungal pathogens were used  
352 including *Fusarium trinctum* (MH894213), *F. acuminatum* (MK764994) and *F. oxysporum* (MK764964). The  
353 fungi were grown on potato dextrose agar (PDA) plates at 25°C for 5 days, and a mycelium plug (0.7 cm in  
354 diameter) was transferred onto PDA plates amended with the soil extract (final concentration V/V: 1%, 5% and  
355 10%). PDA plates amended with equal amount of distilled water were used as controls. The plates were  
356 incubated at 26°C for 5 days and colony diameters were measured. Each treatment had three replicates and the  
357 experiment was conducted twice.

358

### 359 **Metabolomics analysis of alfalfa rhizosphere soil**

360 The rhizosphere soil samples were extracted with methanol-water (v/v 3:1), ethyl acetate,  
361 L-2-chlorophenylalanine, and air dried. The air-dried soil extracts were dissolved in 20 µL methoxyamine salt  
362 and 30 µL BSTFA (containing 1% TMCS). Metabolites of the rhizosphere soils were assessed using 7890A gas

363 chromatography-time-of-flight mass spectrometry (GC-TOF-MS) with DB-5MS capillary column (Agilent,  
364 USA) at Beijing Allwegene Co., Ltd. (Beijing, China). The Chroma TOF software (V 4.3x, LECO) was used to  
365 analyze the mass spectrum data, including peak extraction, baseline correction, deconvolution, peak integration  
366 and peak alignment (Kind *et al.*, 2009). The LECO-Fiehn RTX5 database, including mass spectrometry, match  
367 and retention time index match, was used in the qualitative analysis of the substances.

368

### 369 **Validation of key metabolites**

370 To determine the role of key metabolites in alfalfa CC, the effects of key metabolites from the rhizosphere soils  
371 on seed germination, seedling growth, and growth of root rot pathogens *F. trinctum*, *F. acuminatum* and *F.*  
372 *oxysporum* were determined. The following experiments were conducted:

373

374 ***Effect of key metabolites on alfalfa seed and seedling.*** Alfalfa seeds disinfected as described above were  
375 immersed in different concentrations (10, 25, 50, 100 µg/mL) of key metabolites for 30 min. The seeds were  
376 placed in a sterile culture dish, covered with two layers of sterile filter paper, dripped with the corresponding  
377 concentration of key metabolites (1 mL/two days), and placed in a humidity chamber (>95% RH, 24°C and  
378 16/8 h light/dark). Each treatment had three replicates and the experiment was conducted twice. Seed  
379 germination rate, root length and plant height were measured 7 days after incubation.

380

381 ***Effect of key matabolites on pathogenic fungi causing alfalfa root rot.*** A mycelium plug (0.7 cm in diameter)  
382 of *F. trinctum*, *F. acuminatum* and *F. oxysporum* grown on PDA for 5 days was transferred onto PDA plates  
383 amended with different key metabolites at 10, 25, 50, and 100 µg/mL. The plates were incubated at 26°C in  
384 dark and colony diameters were measured 5 days after incubation. Plates amended with equal amount of sterile  
385 distilled water (SDW) were used as controls. Each treatment had three replicates and the experiment was  
386 conducted twice.

387 To evaluate effects of metabolites on spore germination, *F. trinctum*, *F. acuminatum* and *F. oxysporum* were  
388 grown on PDA at 25°C until colony diameters were 5 cm or larger. Conidia on the plates were washed with  
389 SDW, and the concentration was adjusted to 10<sup>6</sup> spores/mL by counting using a hemocytometer. Different key



390 metabolites were added into the conidial suspensions at concentrations of 10, 25, 50 and 100 µg/mL. Conidial  
391 suspensions amended with an equal volume of SDW served as a control. Spore suspensions were incubated at  
392 25°C until spore germination rates were greater than 10%, and germinated spores were counted by counting  
393 100 spores for each treatment in a replicate. To evaluate effects of metabolites on spore production, the three  
394 fungal cultures were grown as above. Different key metabolites at concentrations of 0, 10, 25, 50, or 100  
395 µg/mL were added to each plate (20 mL/plate). Mycelia on the surface of the PDA plates were scraped off, and  
396 liquid on the plates was poured out after 20 min. The plates were then incubated at 26°C for 72 h, and 20 mL  
397 of SDW was added to a petri dish to wash the spores off the mycelium (Li et al, 2010). Spore suspension in a  
398 dish was collected in a tube (50 mL) and spore concentration was determined using a hemocytometer. Each  
399 treatment had three replicates and the experiment was conducted twice.

400

#### 401 **Microbiological analysis of alfalfa rhizosphere soil**

402 Total DNA was extracted from the rhizosphere soils using PowerSoil DNA Isolation Kit (MoBio Laboratories,  
403 Carlsbad, CA, USA). DNA concentration was quantified using a NanoDrop<sup>TM</sup> 2000 spectrophotometer  
404 (Thermo Fisher Scientific, Waltham, MA, USA). Research on 16S rRNA/ITS sequencing and sequencing of  
405 the complete metagenomic sequence. The primer sets ITS1 (CTTGGTCATTTAGAGGAAGTAA) / ITS2  
406 (TGCGTTCCTCATCGATGC) and 338F (ACTCCTACGGGAGGCAGCAG) / 806R  
407 (GGACTACHVGGGTWTCTAAT) were used to amplify target regions of fungal and bacterial genes,  
408 respectively.

409 The quality-checked DNA samples were then sequenced on Illumina Miseq PE300 platform. To guarantee  
410 the quality of data for downstream analysis, Trimmomatic was used to remove raw reads with tail end quality  
411 score < 20. Data pre-processing was conducted to obtain a good sequence. Through the sorting operation, the  
412 sequences were divided into different groups according to their similarity, and a group was an OTU. All  
413 sequences were divided into OTU according to different similarity level, and OTUs under 97% similarity level  
414 could be analyzed statistically (Edgar, 2013). The data were extracted based on the OTU clustering results, and  
415 the Alpha (Amato et al, 2013) and Beta (Jiang et al, 2013) analyses were carried out using Qiime (Version  
416 1.8, <http://qiime.org/>), uclust (Version 1.2.22, [http://www.drive5.com/uclust/downloads1\\_2\\_22q.html](http://www.drive5.com/uclust/downloads1_2_22q.html)) and



417 usearch (Version 10.0.240, <http://www.drive5.com/usearch/>)

418

#### 419 **Validation of effects of p-coumaric acid in greenhouse**

420 Alfalfa seeds were surface disinfested as described above and planted in a seedling tray in a greenhouse at  
421  $25\pm 2^{\circ}\text{C}$ . Seven-day-old seedlings were transplanted in pots (5 plants/per pot). Plants in 5 pots were treated  
422 with p-coumaric acid 3 days after transplanting at 10, 25, 50, or 100  $\mu\text{g/mL}$ , respectively (1 mL/per plant).  
423 Treatment with p-coumaric acid was applied once every three days, and plants in 5 pots treated with SDW  
424 were used as controls. Alfalfa rhizosphere soils were collected as described above after treatment with  
425 p-coumaric acid for 5 times (i.e., 15 days after transplanting). Soil samples were stored at  $-80^{\circ}\text{C}$  for  
426 microbiological analysis. Soil DNA extraction and microbiological analysis were as described above.

427

#### 428 **Acknowledgements**

429 The authors of this article would like to commemorate Prof. Pingsheng Ji from the Department of Plant  
430 Pathology at the University of Georgia. He is the co-author of this article. He passed away in May this year.  
431 This study was funded by National Natural Science Foundation of China (31971760), and the Heilongjiang  
432 Collaborative Innovation and Extension System of Modern Agricultural Industry Technology of Forage and  
433 Feed.

434

#### 435 **Author contributions**

436 RT performed all experiments. WY and JX provided help of the experiments. YG designed the study and  
437 modify the majority of the manuscript. PS provided comments on the manuscript. All authors read and  
438 approved the final manuscript.

439

#### 440 **Conflict of interest**

441 The authors declare that they have no conflict of interest.

442

443

444 **Reference**

- 445 Abdul-Rahman RA, Habib SA (1989) Allelopathic effect of alfalfa (*Medicago sativa* L.) on bladygrass  
446 (*Imperata cylindrica*). *J Chem Ecol* 15: 2289-2300
- 447 Aislabie JM, Chhour KL, Saul DJ, Miyauchi S, Ayton J, Paetzold RF, Balks MR (2006) Dominant bacteria in  
448 soils of Marble Point and Wright Valley, Victoria Land, Antarctica. *Soil Biol Biochem* 38: 3041-3056
- 449 Amato KR, Yeoman CJ, Kent A, Righini N, Carbonero F, Estrada A, Gaskins HR, Stumpf RM, Yildirim S,  
450 Torralba M, *et al* (2013) Habitat degradation impacts black howler monkey (*Alouatta pigra*)  
451 gastrointestinal microbiomes. *ISME J* 7: 1344–1353
- 452 Bais HP, Weir TL LG, Gilroy S, Vivanco JM (2006) The role of root exudates in rhizosphere interactions with  
453 plants and other organisms. *Annu Rev Plant Biol* 57: 233–266
- 454 Bi XB, Yang JX, Gao WW (2010) Autotoxicity of phenolic compounds from the soil of American ginseng  
455 (*Panax quinquefolium* L.). *Allelopath J* 25: 115–121
- 456 Ghimire BK, Ghimire B, Yu CY, Chung IM (2019) Allelopathic and autotoxic effects of medicago  
457 sativa-derived allelochemicals. *Plants* 8: 233
- 458 Brown SP, Grillo MA, Podowski JC, Heath KD (2020) Soil origin and plant genotype structure distinct  
459 microbiome compartments in the model legume *Medicago truncatula*. *Microbiome* 8(1): 139
- 460 Cantarella H, Otto R, Soares JR, Silva AGB (2018) Agronomic efficiency of NBPT as a urease inhibitor: a  
461 review. *J Adv Res* 13: 19–27
- 462 Chen DM, Yang YH, Jin Y, Wang HB, Duan YQ, You CH (2011) Constituents of autotoxic chemical from  
463 rhizosphere soil under flue-cured tobacco continuous cropping. *Pratacultural Sci* 28 (10): 1766–1769
- 464 Chen M, Li X, Yang Q, Chi X, Pan L, Chen N (2012) Soil eukaryotic microorganism succession as affected by  
465 continuous cropping of peanut-pathogenic and beneficial fungi were selected. *PLoS One* 7 (7): e40659
- 466 Chen P, Wang Y, Liu Q, Zhang Y, Li X, Li H, Li W (2020) Phase changes of continuous cropping obstacles in  
467 strawberry (*Fragaria* × *ananassa* Duch.) production. *Appl Soil Ecol* 155:  
468 103626. doi:10.1016/j.apsoil.2020.103626
- 469 Chung IM, Seigler D, Miller DA (2000) Autotoxic compounds from fresh alfalfa leaf extracts: Identification  
470 and biological activity. *Chem Ecol J* 26(1): 315-327

- 471 Dunn WB, Broadhurst D, Begley P (2011) Procedures for large-scale metabolic profiling of serum and plasma  
472 using gas chromatography and liquid chromatography coupled to mass spectrometry. *Nat Protoc* 6(7):  
473 1060-83
- 474 Edgar RC (2013) UPARSE: Highly accurate OTU sequences from microbial amplicon reads. *Nat Methods*  
475 10(10): 996-998
- 476 Yang F, Wu J, Zhang D, Chen Q, Qian Z, Cheng X (2018) Soil bacterial community composition and diversity  
477 in relation to edaphic properties and plant traits in grasslands of southern China. *Appl Soil Ecol* 128:  
478 43-53
- 479 Graham PH, Vance CP (2003) Legumes: importance and constraints to greater use. *Plant Physiol* 131:  
480 872–877
- 481 Guo ZY, Kong CH, Wang JG, Wang YF (2011) Rhizosphere isoflavones (daidzein and genistein) levels and  
482 their relation to the microbial community structure of mono-cropped soybean soil in filed and controlled  
483 conditions. *Soil Biol Biochem* 43: 2257–2264
- 484 Halvorson JJ, Gonzalez JM, Hagerman AE, Smith JL (2009) Sorption of tannin and related phenolic  
485 compounds and effects on soluble-N in soil. *Soil Biol Biochem* 41(9): 2002–2010
- 486 Hu JL, Yang AN, Zhu AN, Wang JH, Dai J, Wong MH (2015) Arbuscular mycorrhizal fungal diversity, root  
487 colonization, and soil alkaline phosphatase activity in response to maize-wheat rotation and no-tillage in  
488 North China. *J Microbiol* 53(7): 454–461 <https://doi.org/10.1007/s12275-015-5108-2>
- 489 Huang Y, Han X, Yang J, Liang C, Zhan X (2013) Autotoxicity of peanut and identification of phytotoxic  
490 substances in rhizosphere soil. *Allelopath J* 31: 297–308
- 491 Jiang JP, Xiong YC, Jia Y, Li FM, Xu JZ, Jiang HM (2007) Soil quality dynamics under successional alfalfa  
492 field in the semi-arid Loess Plateau of northwestern China. *Arid Land Res Manag* 21: 287-303
- 493 Jiang XT, Peng X, Deng GH, Sheng HF, Wang Y, Zhou HW, Tam NFY (2013) Illumina sequencing of 16S  
494 rRNA tag revealed spatial variations of bacterial communities in a Mangrove Wetland. *Microl Ecol* 66:  
495 96-104
- 496 John J, Sarada (2012) Role of phenolics in allelopathic interactions. *Allelopathy J* 29: 215–230
- 497 Kämpfer P, Witzemberger R, Denner EBM, Busse H, Neef A (2002) *Sphingopyxis wittflariensis* sp. nov.,

- 498 isolated from activated sludge. *Int J Syst Evol Microbiol* 52(6): 2029–2034
- 499 Kind T, Wohlgemuth G, Lee DY (2009) FiehnLib: mass spectral and retention index libraries for metabolomics  
500 based on quadrupole and time-of-flight gas chromatography/mass spectrometry. *Anal Chem* 81(24):  
501 10038-48
- 502 Lanoue A, Burlat V, Henkes GJ, Koch I, Schurr U, Röse UR (2010) De novo biosynthesis of defense root  
503 exudates in response to Fusarium attack in barley. *New Phytol* 185: 577–588
- 504 Li F, Chen L, Zhang J, Yin J, Huang S (2017) Bacterial Community Structure after Long-term Organic and  
505 Inorganic Fertilization Reveals Important Associations between Soil Nutrients and Specific Taxa  
506 Involved in Nutrient Transformations. *Front Microbiol* 8: 1-12
- 507 Li HQ, Zhang LL, Jiang XW, Liu QZ (2015b) Allelopathic effects of phenolic acids on the growth and  
508 physiological characteristics of strawberry plants. *Allelopath J* 35(1): 61–75
- 509 Li JP, Xie YZ, Deng L, Wang KB, Li XW (2018) Soil physico-chemical property dynamics when continually  
510 growing alfalfa (*Medicago sativa*) in the Loess Plateau of China. *Nat Environ Pollut Technol* 17(1):  
511 11-20
- 512 Li W, Cheng ZH, Meng HW (2012) Effect of rotating different vegetables on micro-biomass and enzyme in  
513 tomato continuous cropped substrate and afterculture tomato under plastic tunnel cultivation. *Acta*  
514 *Horticult Sinica* 39(1): 73-80
- 515 Li W, Liu Q, Chen P (2018) Effect of long-term continuous cropping of strawberry on soil bacterial  
516 community structure and diversity. *J Integr Agric* 17(11): 2570–2582
- 517 Li WH, Liu QZ (2018) Changes in fungal community and diversity in strawberry rhizosphere soil after twelve  
518 years in the greenhouse. *J Integr Agric* 18(3): 677–687
- 519 Li XG, Ding CF, Zhang TL, Wang XX (2014b) Fungal pathogen accumulation at the expense of  
520 plant-beneficial fungi as a consequence of consecutive peanut monoculturing. *Soil Biol Biochem* 72:  
521 11-18
- 522 Li ZF, Yang YQ, Xie DF, Zhu LF, Zhang ZG, Lin WX (2012) Identification of autotoxic compounds in fibrous  
523 roots of *Rehmannia* (*Rehmannia glutinosa* Libosch.). *Plos One* 7:  
524 e28806.doi:10.1371/journal.pone.0028806

- 525 Li ZH, Wang Q, Ruan X, Pan CD, Jiang DA (2010) Phenolics and plant allelopathy. *Molecules* 15:  
526 8933–8952
- 527 Lin S, Dai LQ, Chen T, LI ZF, Zhang ZY, Lin WX (2015) Screening and identification of harmful and  
528 beneficial microorganisms associated with replanting disease in rhizosphere soil of *Pseudostellariae*  
529 *heterophylla*. *Int J Agric Biol* 17: 458-466
- 530 Ling N, Raza W, Ma J, Huang Q, Shen Q (2011) Identification and role of organic acids in watermelon root  
531 exudates for recruiting *Paenibacillus polymyxa* SQR-21 in the rhizosphere. *Eur J Soil BioL* 47: 374–379
- 532 Liu PF, Hu HZ, Dai T, Liang L, Liu XL (2018) Metabolomics-a powerful biological analysis tool for plant  
533 pathology research. *J Phytopathol* 48(4): 433-44
- 534 Liu X, Qiu HZ, Zhang WM, Zhang CH, Zhu J, Ma X, Cheng WL (2017) Effect of continuous potato  
535 monoculture on soil chemical and biological properties in Yellow River Irrigation Area in central Gansu  
536 Province. *Chinese J Eco-Agric* 25(4): 581-593
- 537 Liu Z, Liu J, Yu Z, Yao Q, Li Y, Liang A (2020) Long-term continuous cropping of soybean is comparable to  
538 crop rotation in mediating microbial abundance, diversity and community composition. *Soil Till Res* 197:  
539 104503
- 540 Masuda S, Saito M, Sugawara C, Itakura M, Eda S, Minamisawa K (2016) Identification of the hydrogen  
541 uptake gene cluster for chemolithoautotrophic growth and symbiosis hydrogen uptake in  
542 *Bradyrhizobium diazoefficiens*. *Microbes Environ* 31: 76-78
- 543 Meng AD, Dong QS, Yan ZG, Ke F, Ma XJ (2006) Study on the influencing factors of germination of aseptic  
544 seedlings of vinegar Seeds. *Guangxi Med J* 28: 6
- 545 Miller RW (1988) Germination and growth inhibitors of alfalfa. *J Nat Prod* 51: 328–330
- 546 Molero G, Tcherkez G, RocaDo R (2019) Do metabolic changes underpin physiological responses to water  
547 limitation in alfalfa (*Medicago sativa*) plants during a regrowth period. *Agr Water Manage* 212: 1-11
- 548 Muscolo A, Sidari M (2006) Seasonal fluctuations in soil phenolics of a coniferous forest: effects on seed  
549 germination of different coniferous species. *Plant Soil* 284: 305–318 doi:10. 1007/s11104-006-0040-1
- 550 Delmotte N, Knief C, Chaffron S, Innerebner G, Roschitzki B, Schlapbach R, von Mering C, Vorholt JA (2009)  
551 Community proteogenomics reveals insights into the physiology of phyllosphere bacteria. *PNAS*

- 552 106(38): 16428–16433
- 553 Nicholson JK, Lindon JC (2008) Metabonomics. *Nature* 455: 1054-1056
- 554 Pooja S, Mansi V, Kiran B, Aeshna N, Rup L (2010) *Sphingopyxis ummariensis* sp. nov., isolated from a  
555 hexachlorocyclohexane dump site. *Int J Syst Evol Microbiol* 60(5): 1038
- 556 Qu XH, Wang JG (2008) Effect of amendments with different phenolic acids on soil microbial biomass,  
557 activity, and community diversity. *Appl Soil Ecol* 39: 172–179
- 558 Rice EL (1984) Allelopathy, 2nd ed, 1–7. Orlando, FL: Academic Press 41–47: 306–307
- 559 Rong SC, Shi SL, Sun CC (2016) Determination of coumarins and major phenolic acids in plant and  
560 rhizosphere soil of alfalfa (*Medicago sativa* L.). *Soils* 48: 931–938
- 561 Rong SC (2017) Study on the Autoxin Contents and Its Autotoxicity in *Medicago sativa* L. Gansu Agricultural  
562 University, Lanzhou, China.
- 563 Saeki Y, Nakamura M, Mason M.LT, Yano T, Shiro S, SameshimaSaito R (2017) Effect of flooding and the  
564 NosZ gene in Bradyrhizobia on Bradyrhizobial community structure in the soil. *Microbes Environ* 32:  
565 154-163
- 566 Shen Z, Wang D, Ruan Y, Xue C, Zhang J, Li R, Shen Q (2014) Deep 16S rRNA pyrosequencing reveals a  
567 bacterial community associated with Banana Fusarium Wilt disease suppression induced by bio-organic  
568 fertilizer application. *PLoS One* 9(5): e98420
- 569 Shiro S, Kuranaga C, Yamamoto A, Sameshima-Saito R, Saeki Y (2016) Temperature-dependent expression of  
570 NodC and community structure of soybean-nodulating Bradyrhizobia. *Microbes Environ* 31: 27-32
- 571 Siqueira AF, Minamisawa K, Sánchez C (2017) Anaerobic reduction of nitrate to nitrous oxide is lower in  
572 *Bradyrhizobium japonicum* than in *Bradyrhizobium diazoefficiens*. *Microbes Environ* 32: 398-401
- 573 Tao R, Yin GL, Shi SL (2018) Study on the Alleopathy of phenolic acids on alfalfa seed germination. *Glassl*  
574 *Turf* 38(8): 96-101
- 575 Tawaraya K, Horie R, Saito S, Wagatsuma T, Saito K, Oikawa A (2014) Metabolite profiling of root exudates  
576 of common bean under phosphorus deficiency. *Metabolites* 4(3): 599–611 [https://doi.org/10.](https://doi.org/10.3390/metabo4030599)  
577 [3390/metabo4030599](https://doi.org/10.3390/metabo4030599) PMID: 25032978
- 578 Vasileva V, Kostov O (2015) Effect of mineral and organic fertilization on alfalfa forage and soil fertility.

- 579 *Emirates J Food Agr* 27(9): 678-686
- 580 Williams TJ, Ertan H, Ting L, Cavicchioli R (2009) Carbon and nitrogen substrate utilization in the marine  
581 bacterium *Sphingopyxis alaskensis* strain RB2256. *ISME J* 3(9): 1036
- 582 Wu FZ, Wang XZ, Xue CY (2009) Effect of cinnamic acid on soil microbial characteristics in the cucumber  
583 rhizosphere. *Eur J Soil Biol* 45(4): 356–362
- 584 Wu HJ, Yang GF, Sun J, Li CZ, Liu HQ, Li HM (2015) Responses of soil structure and nutrients under  
585 different alfalfa planting patterns. *J North China Agr* 30: 189-196
- 586 Wu LK, Wang JY, Huang WM, Wu HM, Chen J, Yang YQ, Zhang ZY, Lin WX (2015) Plant-microbe  
587 rhizosphere interactions mediated by *Rehmannia glutinosa* root exudates under consecutive  
588 monoculture. *Sci Rep* 5: 1–11
- 589 Wyman-Simpson CL, Waller GR, Jurysta M (1991) Biological activity and chemical isolation of root saponins  
590 of six cultivars of alfalfa (*Medicago sativa* L.). *Plant Soil* 135: 83–94
- 591 Xia FS, Yan HF, Wang MY, Wang H, Zhu YQ, Mao PS (2015) Research progress on the effects of alfalfa  
592 continuous cropping on soil physical and chemical properties. *Chinese Herb Sci* 35(2): 48-50
- 593 Xie K, Guo L, Bai Y, Liu W, Yan J, Bucher M (2019) Microbiomics and plant health: An interdisciplinary and  
594 international workshop on the plant microbiome. *Mol Plant* 12: 1-3 doi:10.1016/j.molp.2018.11.004
- 595 Yang Q, Wang X, Shen YY (2009) Effect of different age alfalfa soil extract on seed germination of three  
596 plants. *J Grassl* 17(06): 784-788
- 597 Zak JC, Willig MR, Moorhead DL, Wildman HG (1996) Functional diversity of microbial communities: A  
598 quantitative approach. *Soil Biol Biochem* 26(9): 1101-1108
- 599 Zhang B, Li XZ, Wang FQ, Li MJ, Zhan JY, Gu L, Zhang LJ, Tu WQ, Zhang ZY (2016) Assaying the potential  
600 autotoxins and microbial community associated with *Rehmannia glutinosa* replant problem based on its  
601 autotoxic circle. *Plant soil* 407(1-2): 307-322
- 602 Zhang PP, Feng BL, Wang PK, Dai HP, Song H, Gao XL (2012) Leaf senescence and activities of antioxidant  
603 enzymes in different broomcorn millet (*Panicum miliaceum* L.) cultivars under simulated drought  
604 condition. *J Food Agric Environ* 10(2): 438–444
- 605 Zhao QY, Xiong W, Xing YZ, Sun Y, Lin XJ, Dong YP (2018) Long-term coffee monoculture alters soil

- 606 chemical properties and microbial communities. *Sci Rep* 8: 1-11
- 607 Zheng R, Shi SL, Ma SC (2018) The effect of toxic substances from external sources on the growth and  
608 development of first buds and wheat. *Grassl Lawn* 38(6): 1-11
- 609 Zhou XG, and Wu FZ (2012a) P-coumaric acid influenced cucumber rhizosphere soil microbial communities  
610 and the growth of *Fusarium oxysporum* f. sp. *cucumerinum* Owen. *PLoS ONE* 7: e48288
- 611 Zhou XG, Wu FZ (2012b) Dynamics of the diversity of fungal and *Fusarium* communities during continuous  
612 cropping of cucumber in the greenhouse. *FEMS Microbiol Ecol* 80: 469–478
- 613 Zhou XG, Yu G, Wu FZ (2012) Soil phenolics in a continuously mono-cropped cucumber (*Cucumis sativus* L.)  
614 system and their effects on cucumber seedling growth and soil microbial communities. *Eur J Soil Sci* 63:  
615 332–340
- 616 Zuo S, Fang Z, Yang S, Wan K, Han Y (2015) Effect of allelopathic potential from selected aquatic  
617 macrophytes on algal interaction in the polluted water. *Biochem. Syst. Ecol* 61: 133–138



618

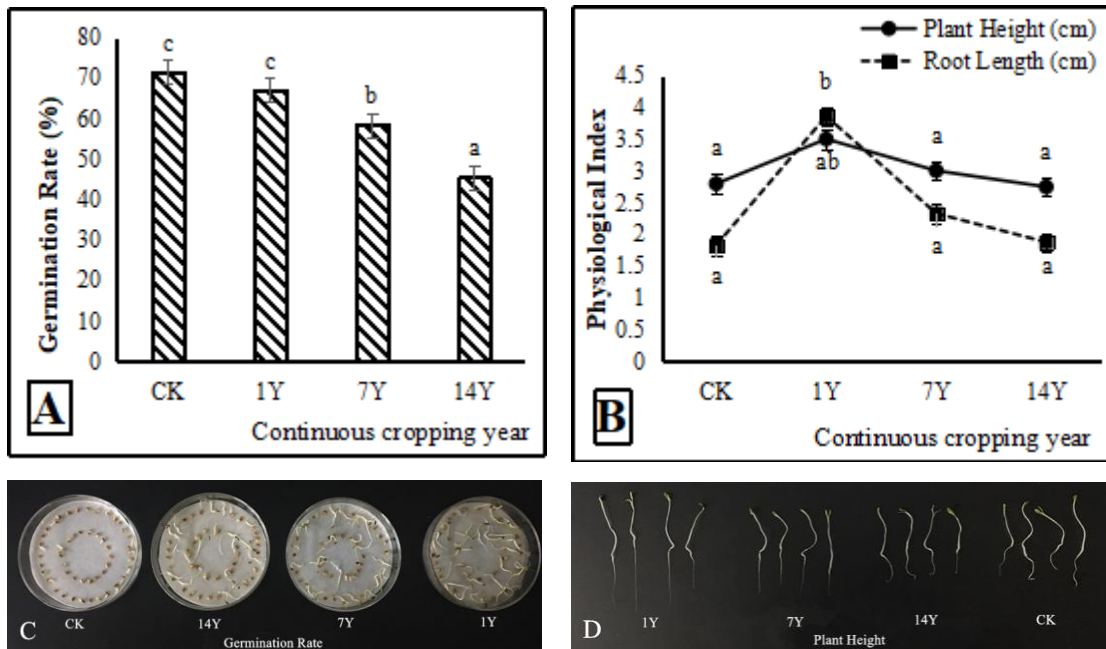

619 Fig.1. Effects of rhizosphere soil extracts from fields with different years of alfalfa continuous cropping  
620 on alfalfa seed germination (A, C) and seedling growth (B, D). Error bars indicate standard errors of the  
621 means of three repetitions. Different letters above the bars indicate significant difference according to  
622 Duncan's multiple range test ( $P = 0.05$ ).

623

624

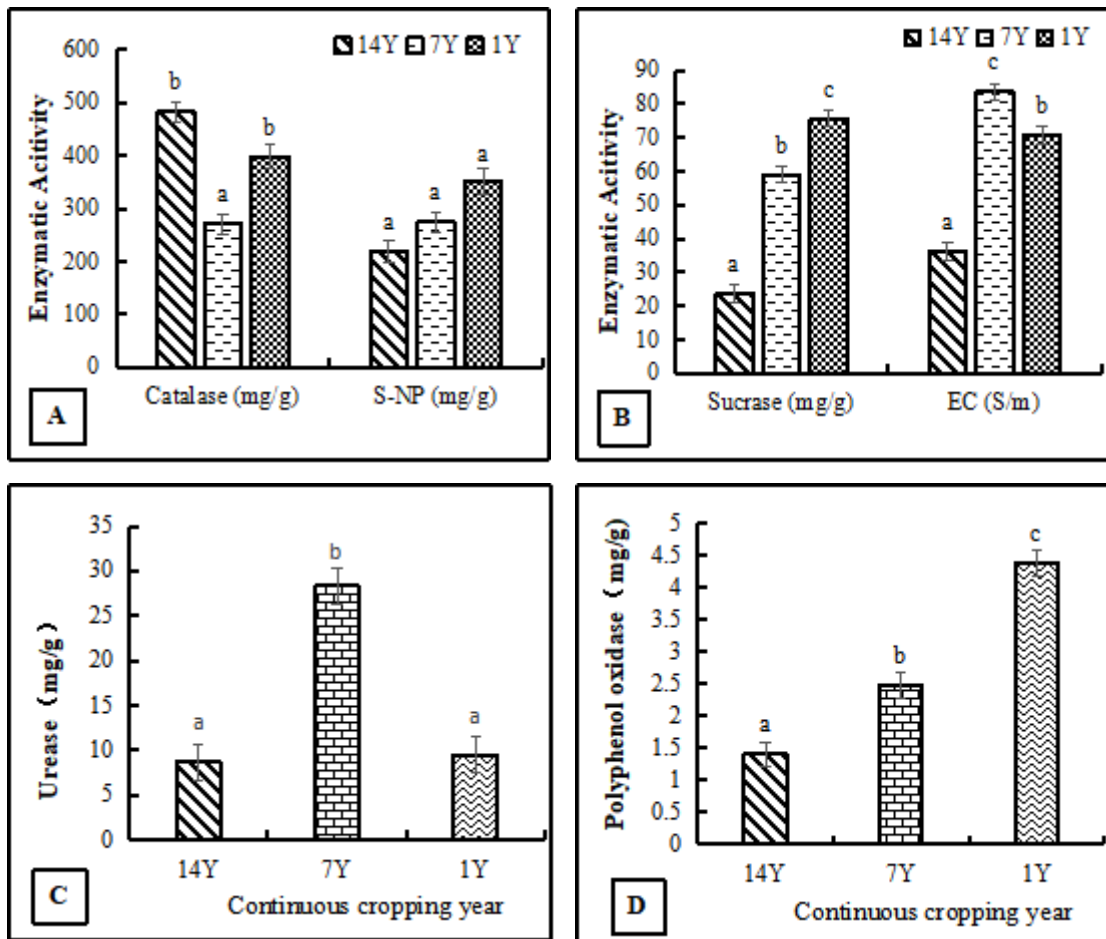

625 Fig. 2. Changes of enzyme activity, electrical conduction and organic matter content in rhizosphere soils  
 626 from fields with continuous cropping of alfalfa for 1, 7, and 14 years. A) Catalase and S-NP activity; B)  
 627 Sucrase activity and electrical conduction; C) Urease activity; D) Polyphenol oxidase activity. Error bars  
 628 indicate standard errors of the means of three repetitions. Different letters above the bars indicate  
 629 significant difference according to Duncan's multiple range test ( $P = 0.05$ ).

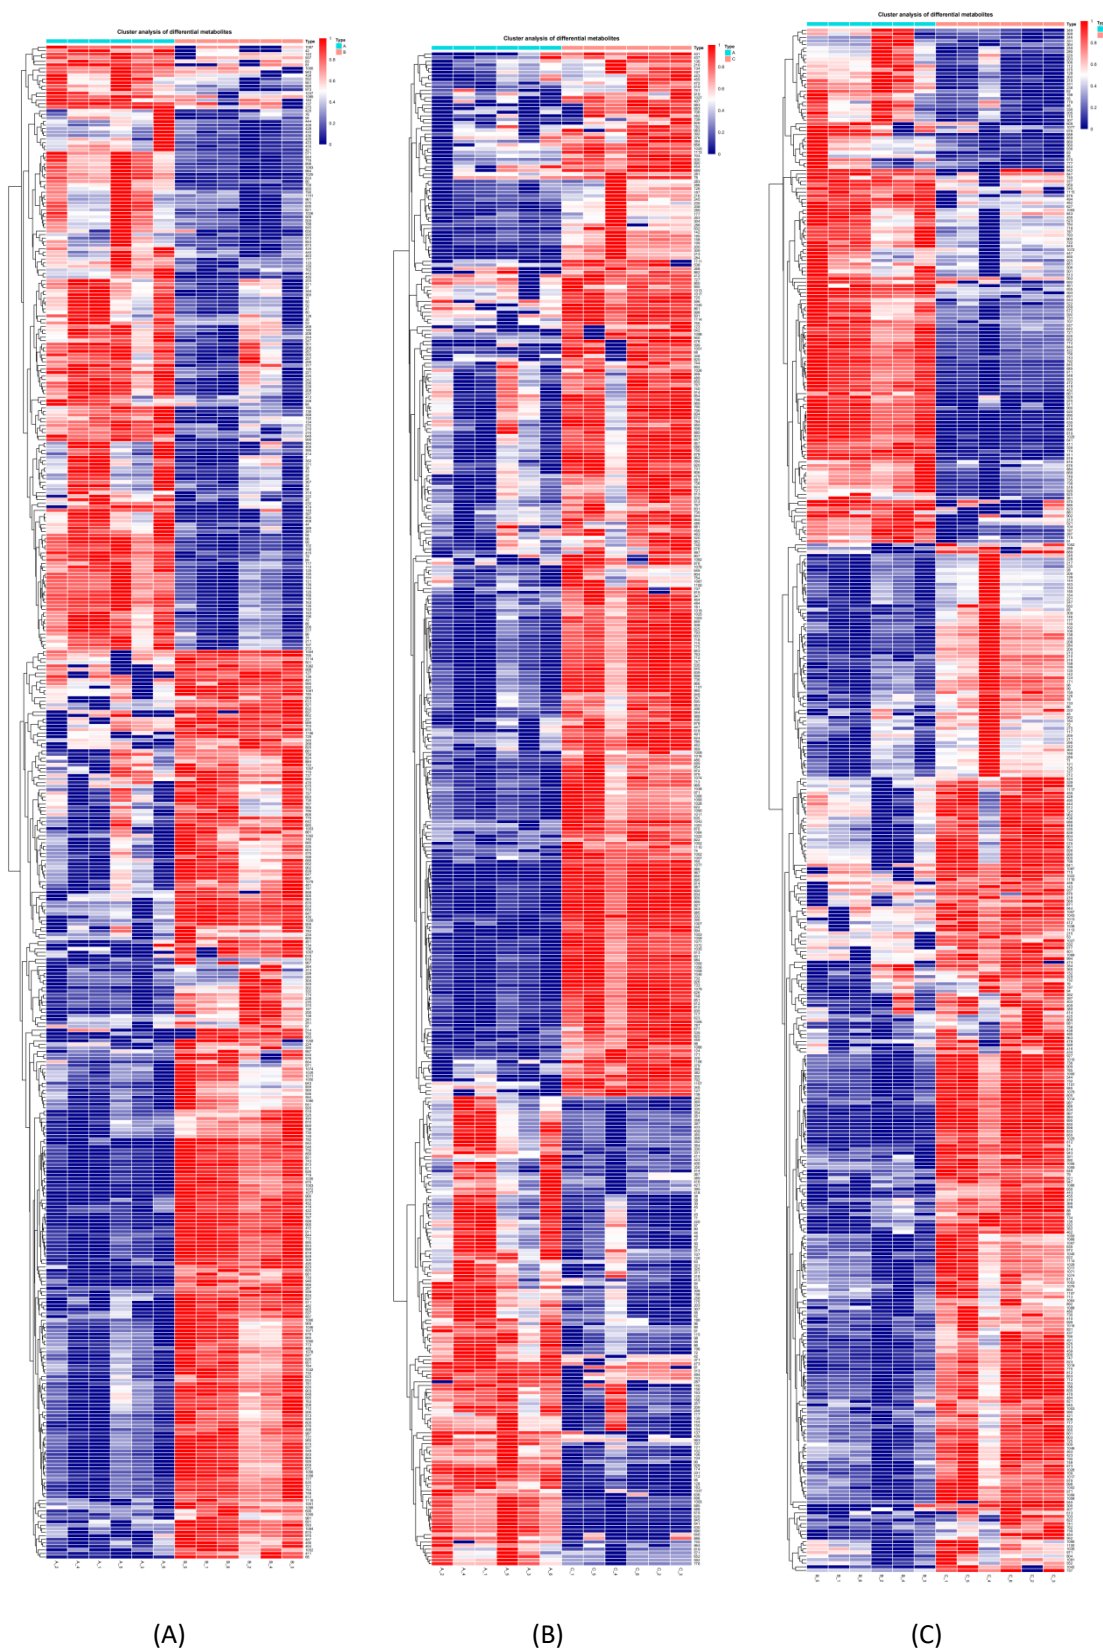

630 Fig 3. Heatmap analysis of two-year comparison of changes of alfalfa root exudates from fields with

631 different years of continuous cropping. A) 1-year vs. 7-year; B) 7-year vs. 14-year; C) 1-year vs. 14-year.  
632

633

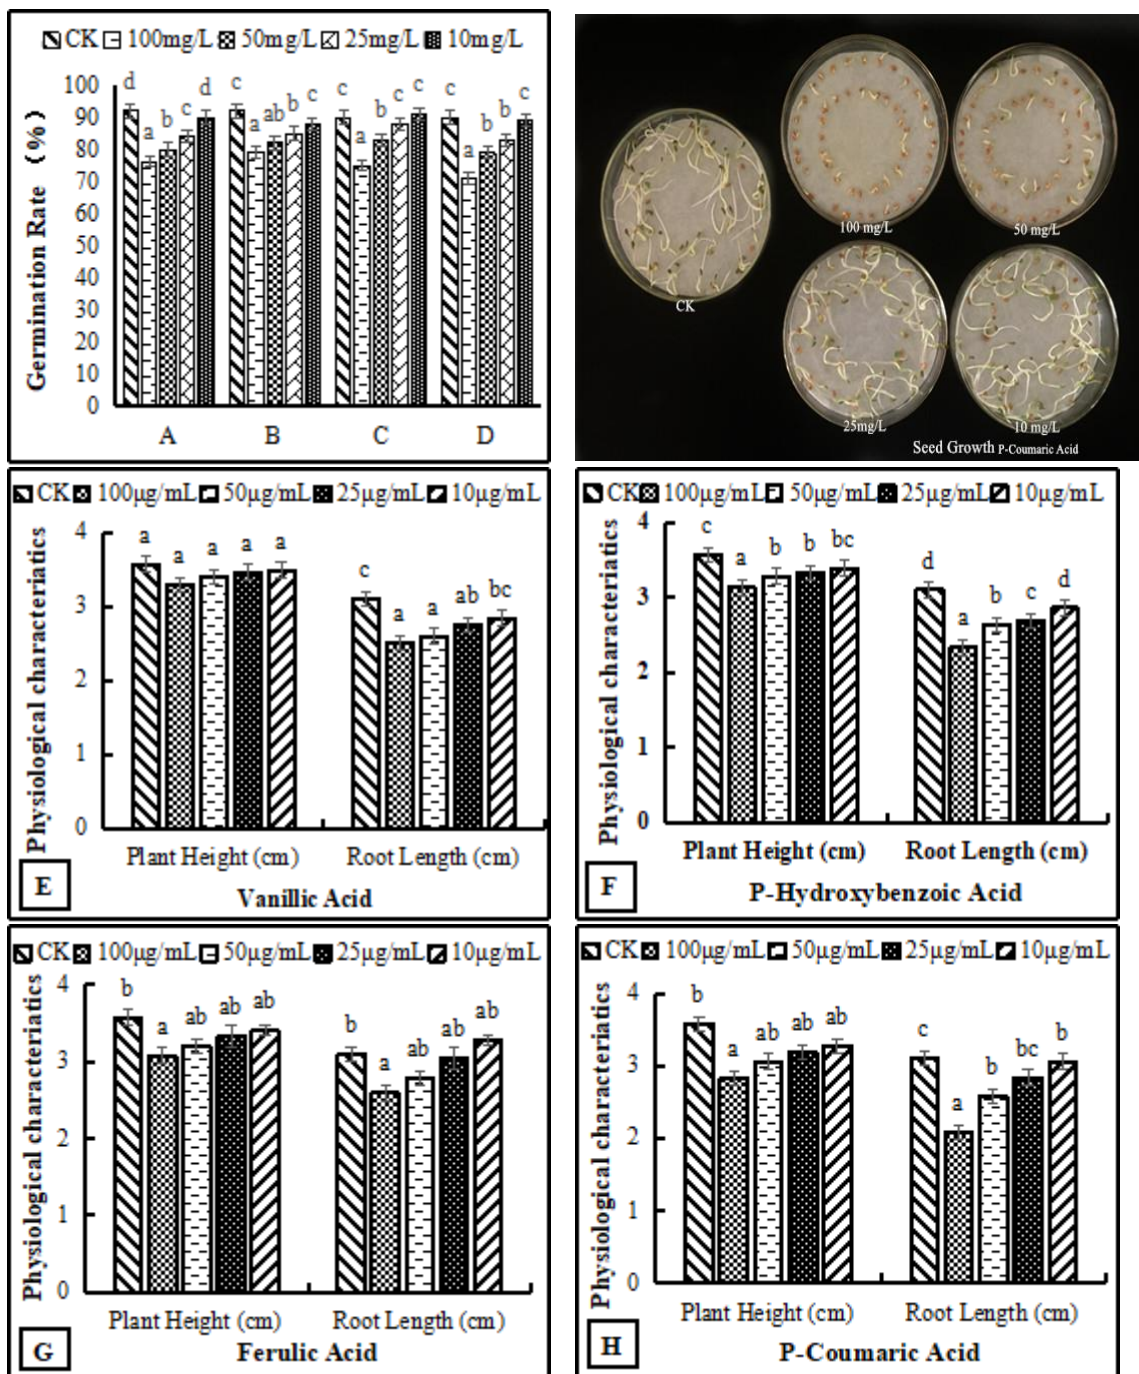

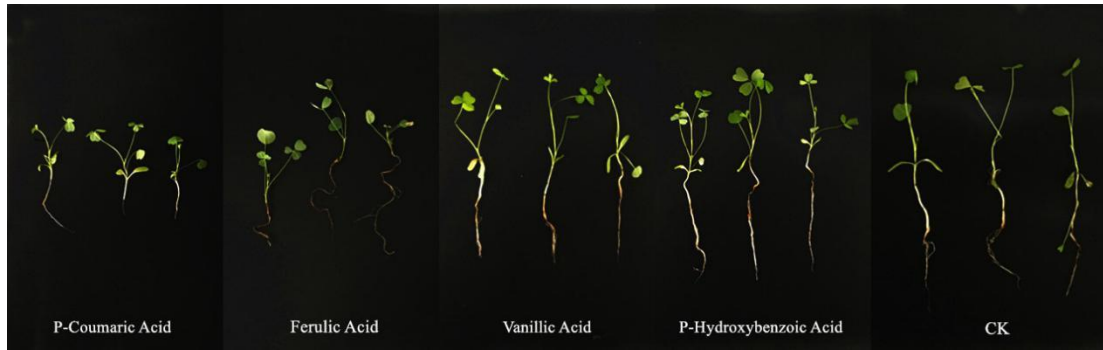

634

635 Fig. 4. Effect of different concentrations of phenolic acids on alfalfa germination rate, root length and  
636 plant height (E, F, G, H). A) Vanillic Acid; B) P-Hydroxybenzoic Acid; C) Ferulic Acid; D) P-Coumaric  
637 Acid. Error bars indicate standard errors of the means of three repetitions. Different letters above the bars  
638 indicate significant difference according to Duncan's multiple range test ( $P = 0.05$ ).

639

640

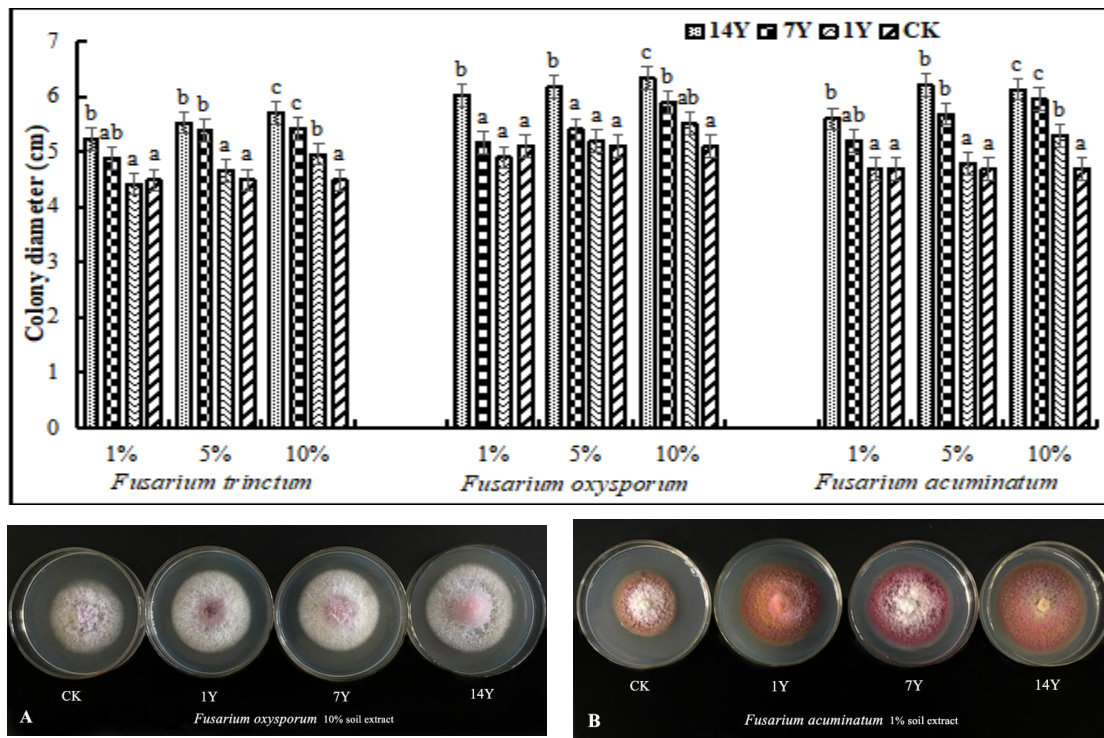

641

642 Fig. 5. Effect of rhizosphere soil extracts (final concentration V/V: 1%, 5% and 10%) from fields with  
 643 alfalfa continuous cropping for 1, 7, and 14 years on mycelial growth of *Fusarium oxysporum*, *F. trinctum*  
 644 and *F. acuminatum* that cause alfalfa root rot. A) Effect of 10% soil extract on mycelial growth of *F.*  
 645 *oxysporum*; B) Effect of 1% soil extract on mycelial growth of *F. acuminatum*. Error bars indicate  
 646 standard errors of the means of three repetitions. Different letters above the bars indicate significant  
 647 difference according to Duncan's multiple range test ( $P = 0.05$ ).

648



649

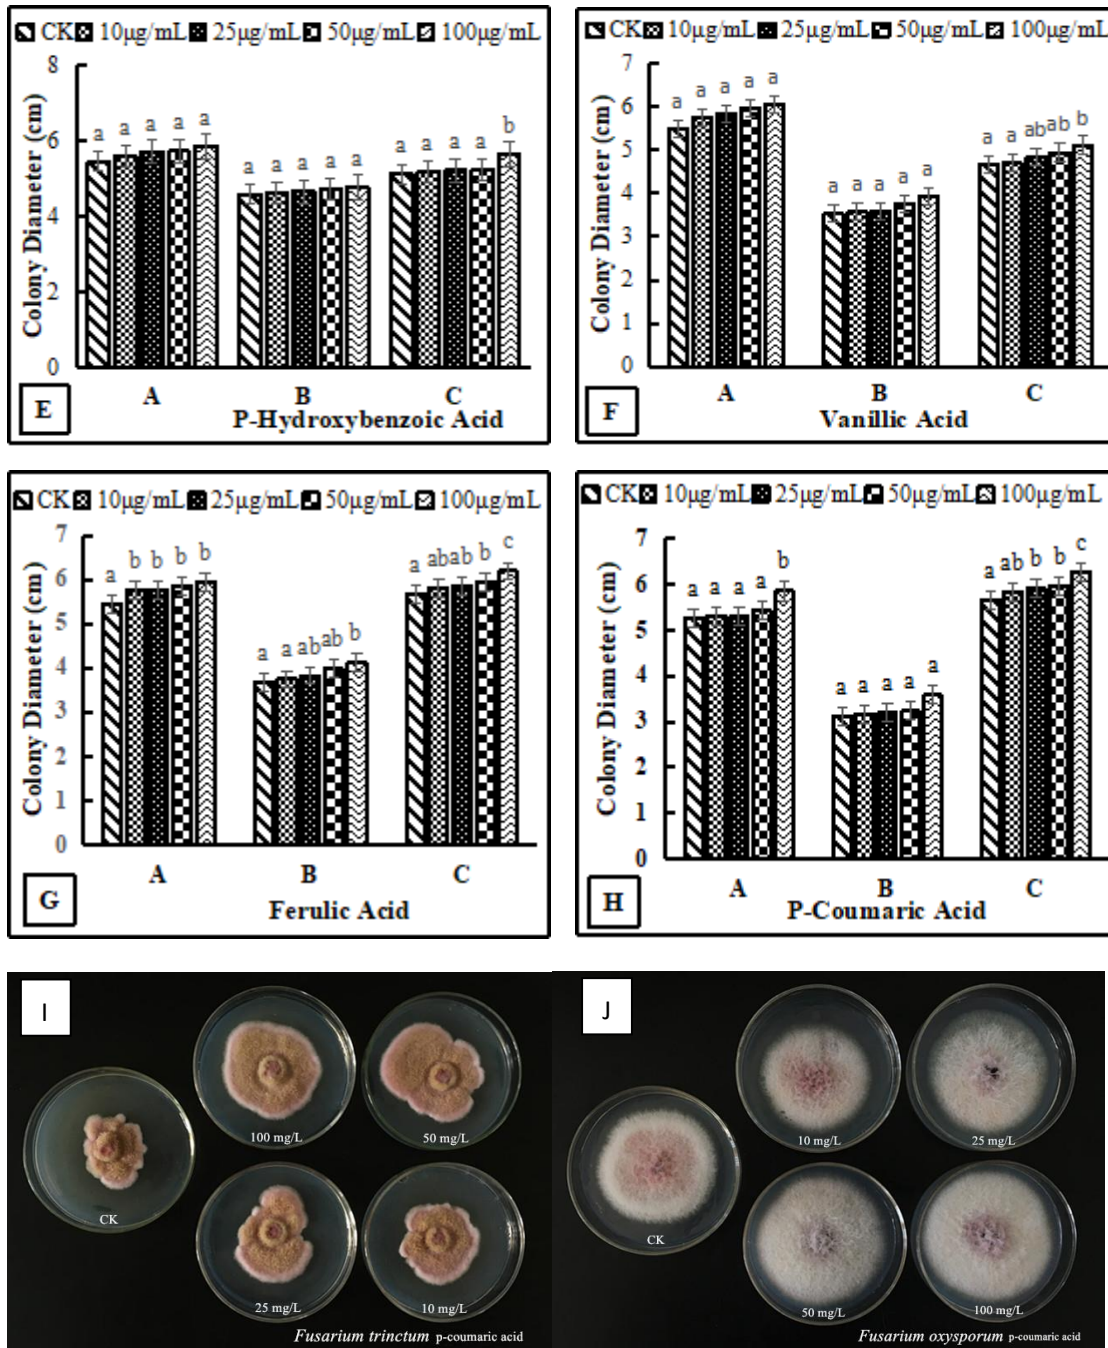

650

651 Fig. 6. Effects of different concentrations of phenolic acids on mycelial growth of fungal pathogens that  
 652 cause alfalfa root rot. A, B and C indicate *Fusarium oxysporum*, *F. trinctum* and *F. acuminatum*,  
 653 respectively (E, F, G, H). Error bars indicate standard errors of the means of three repetitions. Different  
 654 letters above the bars indicate significant difference according to Duncan's multiple range test ( $P = 0.05$ ).  
 655 I) Effect of p-coumaric acid on mycelial growth of *F. trinctum*; J) Effect of p-coumaric acid on mycelial  
 656 growth of *F. oxysporum*.

657



658

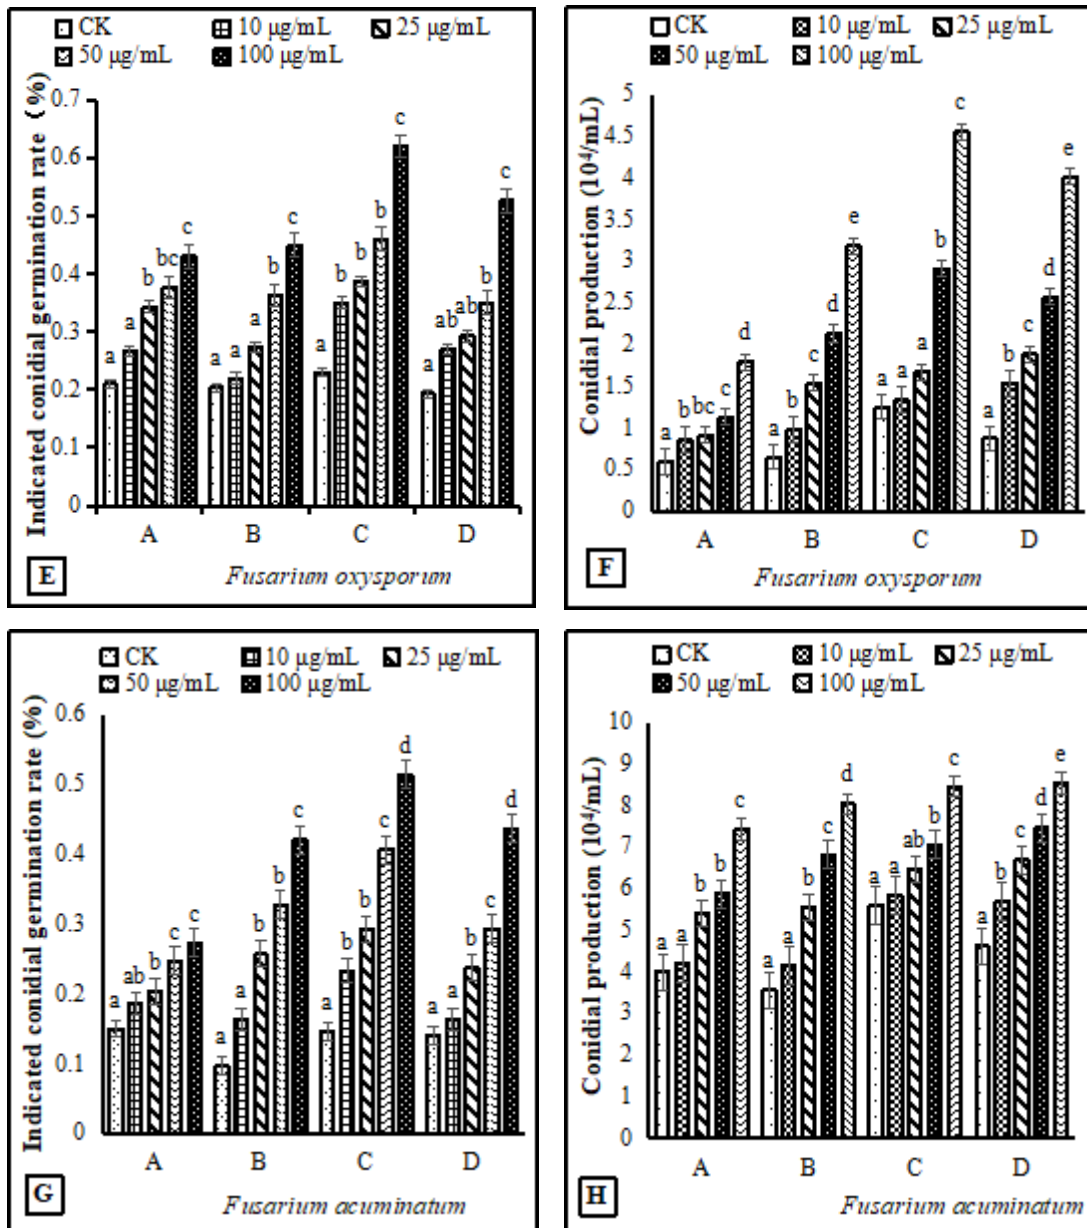

659

660 Fig. 7. Effects of phenolic acids on conidial germination and production of *Fusarium oxysporum* (E, F)  
 661 and *F. acuminatum* (G, H) that cause alfalfa root rot. A, B, C and D indicate p-hydroxybenzoic acid,  
 662 vanillic acid, ferulic acid and p-coumaric acid, respectively. Different letters above the bars indicate  
 663 significant difference according to Duncan's multiple range test ( $P = 0.05$ ).  
 664

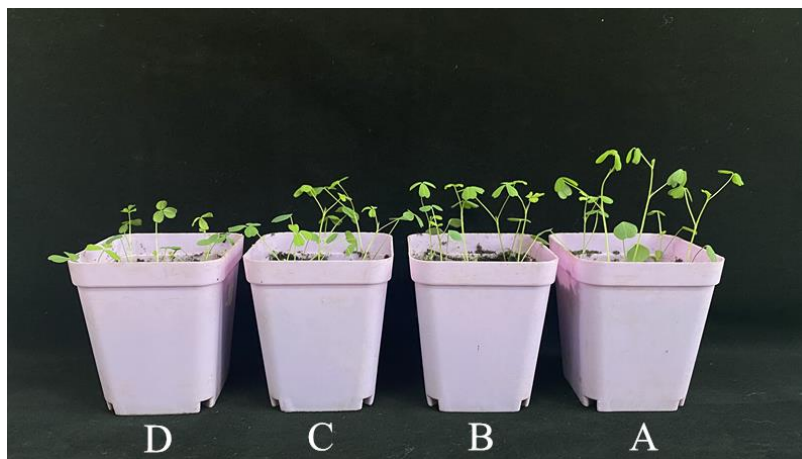

665

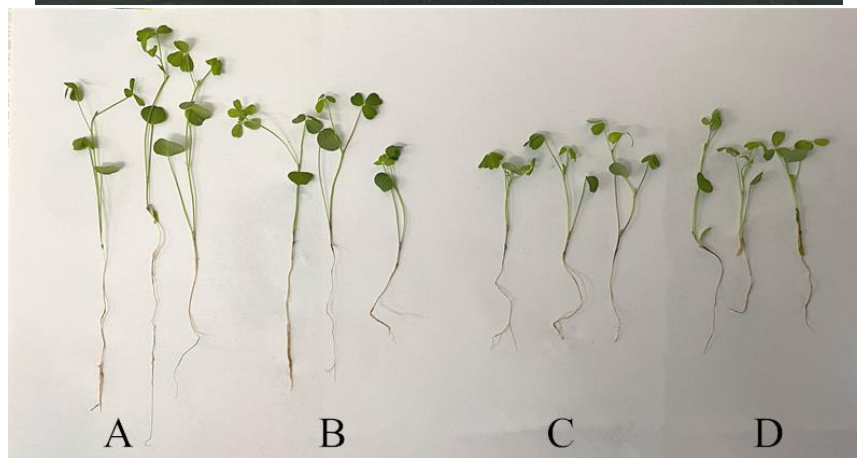

666

667

668 Fig. 8. Effect of p-coumaric acid on alfalfa seedling and root rot. A) Inoculated with water as control; B)  
669 Inoculated with mixed spore suspensions of *Fusarium trinctum*, *F. acuminatum* and *F. oxysporum*; C)  
670 Inoculated with mixed spore suspensions of the three *Fusarium* spp. and 10  $\mu\text{g}/\text{mL}$  p-coumaric acid; D  
671 Inoculated with mixed spore suspensions of the three *Fusarium* spp. and 50  $\mu\text{g}/\text{mL}$  p-coumaric acid.

672

673

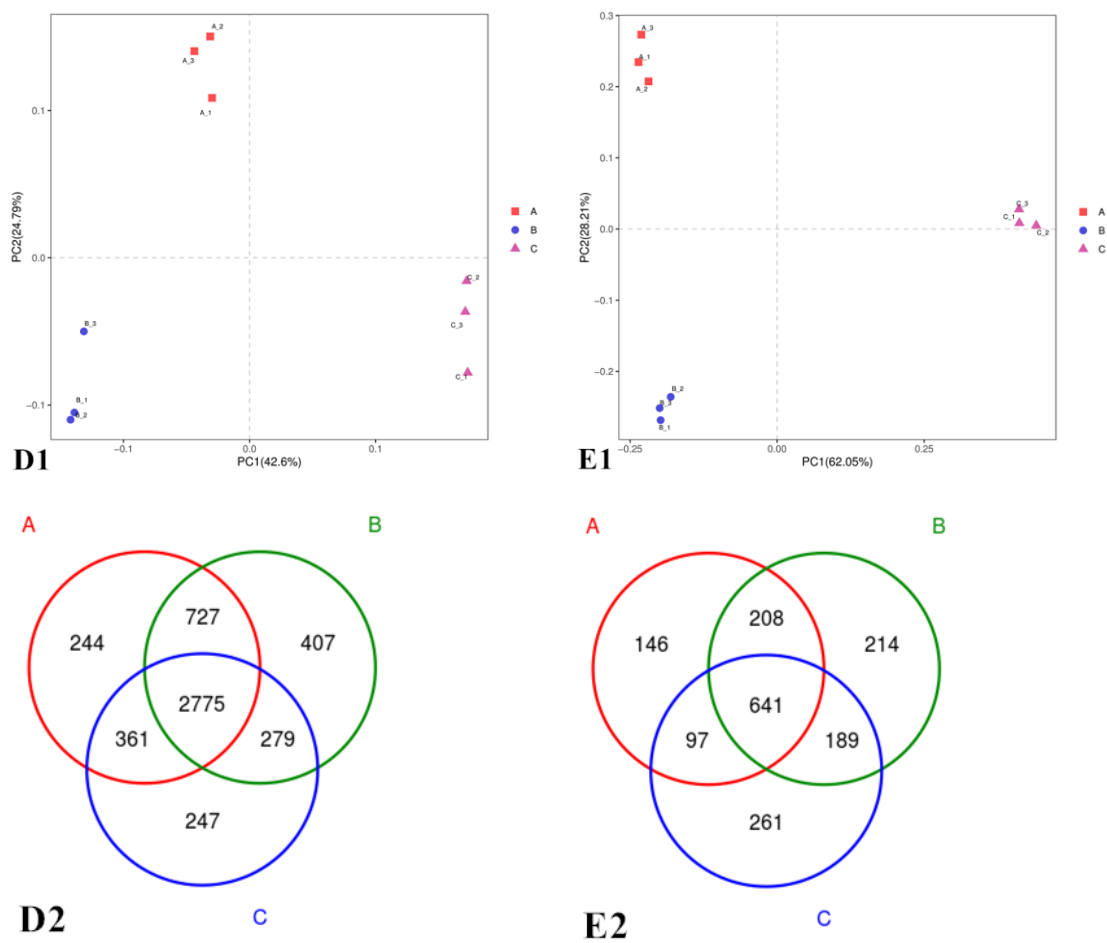

674

675 Fig. 9. Principal coordinate analysis (PCoA) showing the similarity of rhizosphere microbial community  
 676 in fields with continuous cropping of alfalfa for 1 year (A), 7 years (B), and 14 years (C). D1) bacteria,  
 677 and E1) fungi. D2) Venn diagram of bacteria, and E2) Venn diagram of fungi.

678

679

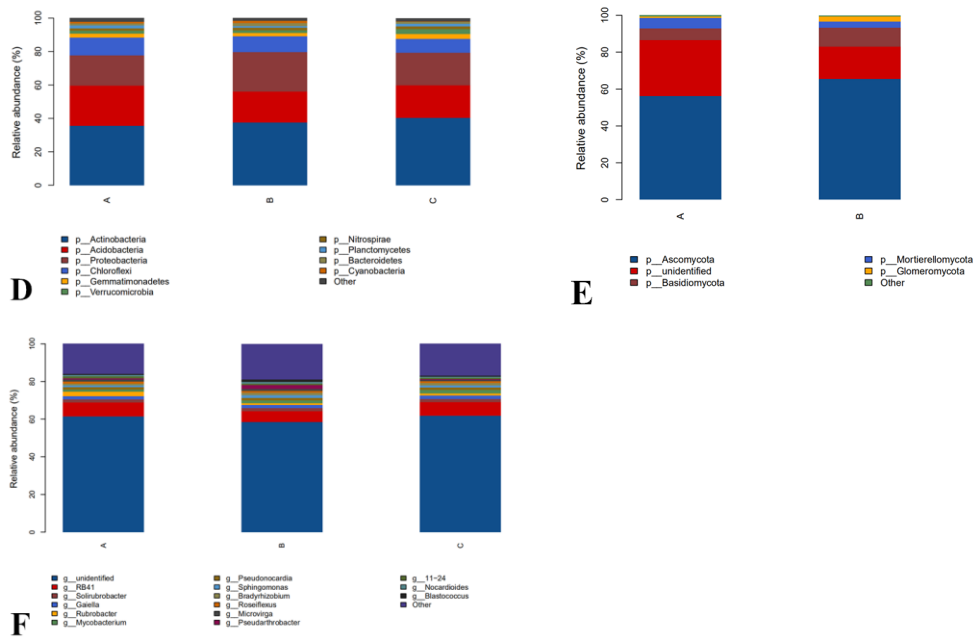

680 Fig. 10. The relative abundance (%) of major bacteria (D) and fungi (E) phylum, and bacterial genus (F),  
 681 in the microbial community of alfalfa rhizosphere soils from fields with continuous cropping of alfalfa for  
 682 1, 7, and 14 years.

683

684

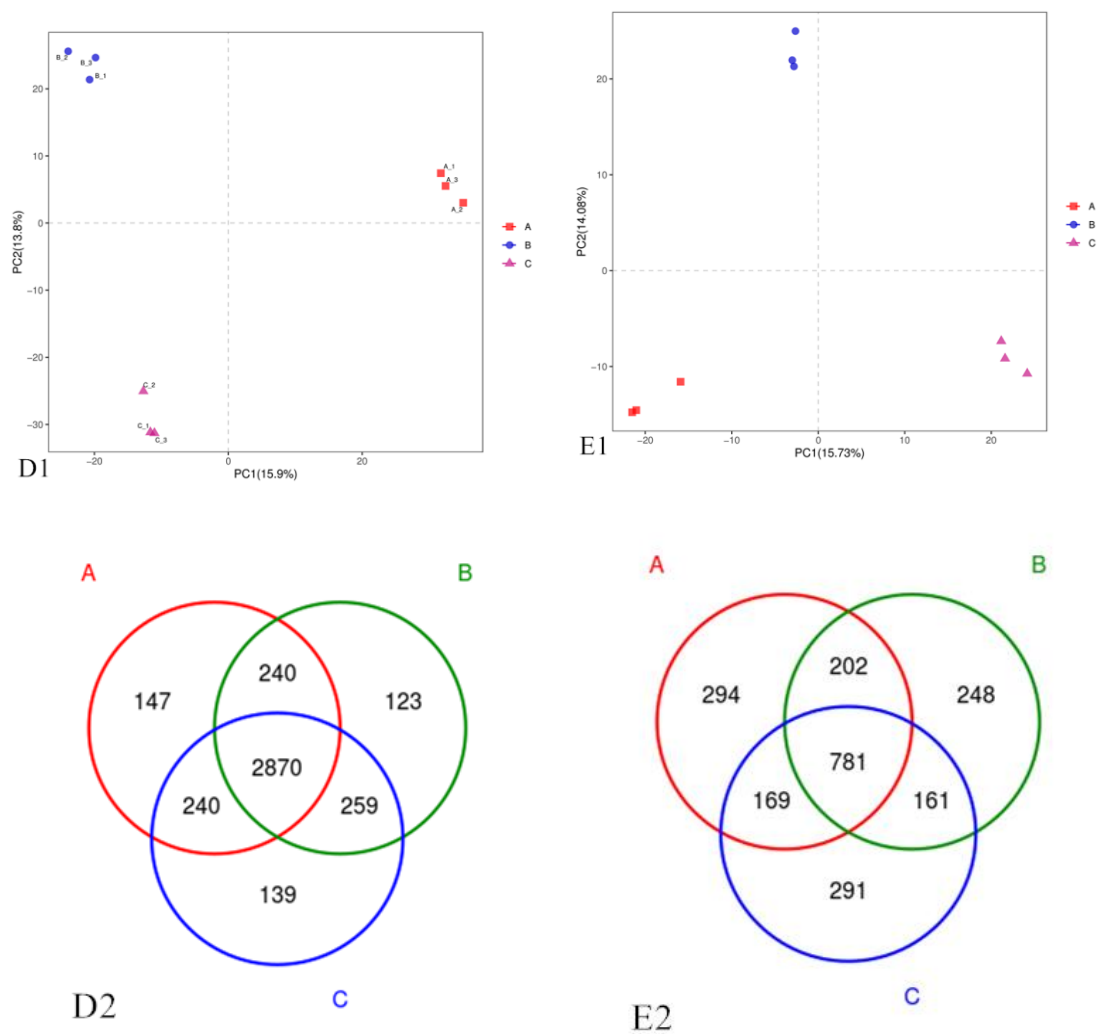

685

686 Fig. 11. Principal coordinate analysis (PCoA) showing the similarity of rhizosphere microbial community  
 687 in fields with A (nontreated), B (treatment with 10  $\mu\text{g}/\text{mL}$  p-coumaric acid), C (treatment with 50  $\mu\text{g}/\text{mL}$   
 688 p-coumaric acid). D1) bacteria, and E1) fungi. D2) Venn diagram of bacteria, and E2) Venn diagram of  
 689 fungi.

690

691

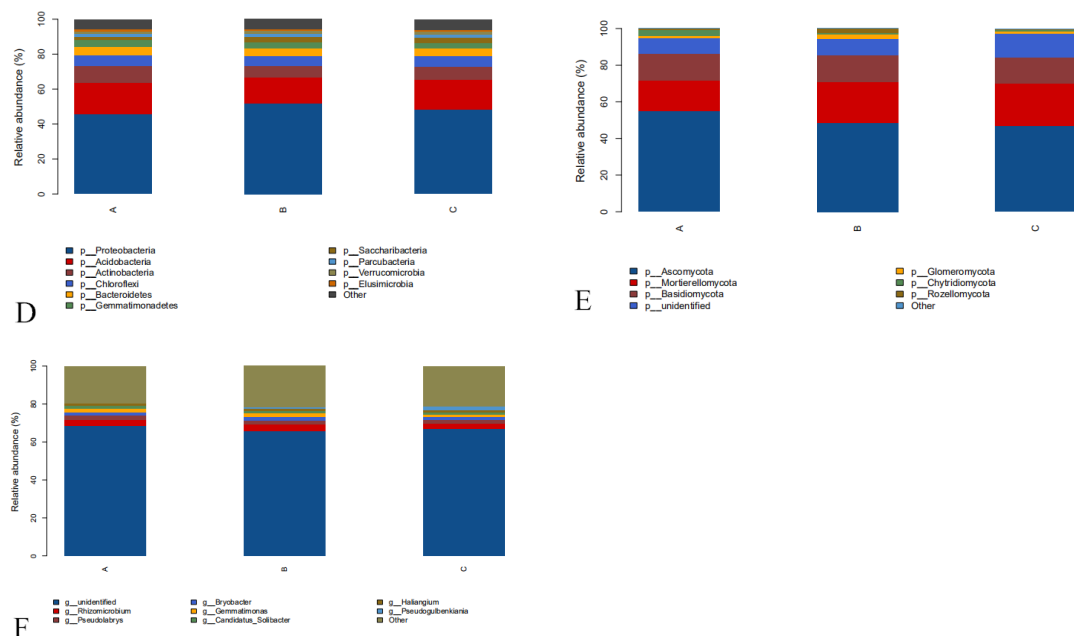

692

693 Fig. 12. The relative abundance (%) of major bacteria (D) and fungi (E) phylum, and bacterial genus (F),  
 694 in the microbial community of alfalfa rhizosphere soils from fields with A) nontreated, B) treatment with  
 695 10 µg/mL p-coumaric acid, and C) treatment with 50 µg/mL p-coumaric acid.



Table 1. Nutrient content of rhizosphere soils from fields with alfalfa continuous cropping

| CC year <sup>a</sup> | Alkali-hydrolyzed N (mg/kg) | Available P (mg/kg) | Available K (mg/kg) | Available B (mg/kg) | Available Fe (mg/kg) | Available Mn (mg/kg) | Available Cu (mg/kg) | Available Zn (mg/kg) | Available Mg (mg/kg) |
|----------------------|-----------------------------|---------------------|---------------------|---------------------|----------------------|----------------------|----------------------|----------------------|----------------------|
| 14                   | 75.5                        | 2.2                 | 102                 | 0.46                | 11.2                 | 3.86                 | 1                    | 1.5                  | 139                  |
| 7                    | 101                         | 3.1                 | 97.1                | 0.56                | 8.2                  | 2.9                  | 0.71                 | 0.88                 | 122                  |
| 1                    | 147.6                       | 3.1                 | 159                 | 0.9                 | 34.2                 | 7.56                 | 0.58                 | 0.85                 | 191                  |

<sup>a</sup> Indicates alfalfa continuous cropping (CC) for 1, 7, and 14 years.



bioRxiv preprint doi: <https://doi.org/10.1101/2021.07.25.453728>; this version posted July 28, 2021. The copyright holder for this preprint (which was not certified by peer review) is the author/funder, who has granted bioRxiv a license to display the preprint in perpetuity. It is made available under a [CC-BY-NC 4.0 International license](#).

Table 2. Relative content of phenolic acids from rhizosphere soils in fields with alfalfa continuous cropping

| CC year <sup>a</sup> | Vanillic acid <sup>b</sup> | p-Hydroxybenzoic acid <sup>b</sup> | Ferulic acid <sup>b</sup> | p-Coumaric acid <sup>b</sup> |
|----------------------|----------------------------|------------------------------------|---------------------------|------------------------------|
| 1                    | 0.050 ± 0.008 a            | 0.127 ± 0.014 a                    | 0.031 ± 0.004 a           | 0.056 ± 0.011 a              |
| 7                    | 0.068 ± 0.007 b            | 0.171 ± 0.013 b                    | 0.026 ± 0.004 a           | 0.079 ± 0.009 b              |
| 14                   | 0.070 ± 0.006 b            | 0.212 ± 0.017 c                    | 0.046 ± 0.012 b           | 0.097 ± 0.011 c              |

<sup>a</sup> Indicates alfalfa continuous cropping (CC) for 1, 7, and 14 years.

<sup>b</sup> Different letters in the column indicate significant difference according to Duncan's multiple range test ( $P = 0.05$ ).

bioRxiv preprint doi: <https://doi.org/10.1101/2021.07.25.453728>; this version posted July 28, 2021. The copyright holder for this preprint (which was not certified by peer review) is the author/funder, who has granted bioRxiv a license to display the preprint in perpetuity. It is made available under a [CC-BY-NC 4.0 International license](#).
